1 **Conformational surveillance of Orai1 by a rhomboid intramembrane**  
2 **protease prevents inappropriate CRAC channel activation**

3

4 Adam G Grieve<sup>1,6</sup>, Yi-Chun Yeh<sup>2</sup>, Lucrezia Zarcone<sup>1</sup>, Johannes Breuning<sup>1,4</sup>, Nicholas Johnson<sup>3,5</sup>,  
5 Kvido Stříšovský<sup>3</sup>, Marion H Brown<sup>1</sup>, Anant B Parekh<sup>2</sup> and Matthew Freeman<sup>1,6,7</sup>.

6

7 <sup>1</sup> Sir William Dunn School of Pathology, University of Oxford, UK

8

9 <sup>2</sup> Department of Physiology, Anatomy and Genetics, University of Oxford, UK

10

11 <sup>3</sup> Institute of Organic Chemistry and Biochemistry of the Czech Academy of Sciences (IOCB),  
12 Czech Republic

13

14 <sup>4</sup> Current address: GlaxoSmithKline (GSK), UK

15

16 <sup>5</sup> Current address: Cancer Research UK Beatson Institute, UK

17

18 <sup>6</sup> Corresponding authors: [adam.grieve@path.ox.ac.uk](mailto:adam.grieve@path.ox.ac.uk) and [matthew.freeman@path.ox.ac.uk](mailto:matthew.freeman@path.ox.ac.uk)

19

20 <sup>7</sup> Lead contact

21

22

23

24 Key words: Intramembrane protease, rhomboid, RHBDL2, calcium signalling, Orai1, Stim1, CRAC  
25 channel, membrane protein, homeostasis, T cells

26

27

28 Running head: Rhomboid protease controls calcium signalling

29

30 **Summary**

31

32 Calcium influx through plasma membrane calcium release-activated calcium (CRAC) channels,  
33 which are formed of hexamers of Orai1, is a potent trigger for many important biological processes,  
34 most notably in T cell mediated immunity. Through a bioinformatics-led cell biological screen, we  
35 have identified Orai1 as a substrate for the rhomboid intramembrane protease, RHBDL2. We show  
36 that RHBDL2 prevents stochastic signalling in unstimulated cells through conformational  
37 surveillance and cleavage of inappropriately activated Orai1. A conserved, disease-linked proline  
38 residue is responsible for RHBDL2 recognising only the active conformation of Orai1, and  
39 cleavage by RHBDL2 is required to sharpen switch-like signalling triggered by store-operated  
40 calcium entry. Loss of RHBDL2 control of Orai1 causes severe dysregulation of CRAC channel  
41 effectors including transcription factor activation, inflammatory cytokine expression and T cell  
42 activation. We propose that this seek-and-destroy function may represent an ancient activity of  
43 rhomboid proteases in degrading unwanted signalling proteins.

## 44 Introduction

45

46 Signalling controls most cellular functions and must therefore be precisely regulated in time and  
47 space. Although some signals produce graded responses, most are converted into binary outputs:  
48 having received an input, usually a ligand binding to a receptor, a cell changes its state in a switch-  
49 like way. Much signalling is triggered by integral membrane receptors including, for example,  
50 growth factor and cytokine receptors, ion channels, and G protein coupled receptors. To maintain  
51 switch-like signalling, it is essential that spontaneous activation is prevented in the absence of  
52 stimulus, but the post-translational control mechanisms for surveillance and prevention of  
53 inappropriate signalling are unknown. More generally, little is known about the regulation of the  
54 abundance and activity of most cell surface signalling proteins.

55

56 A good example of switch-like signalling is the control of calcium ion ( $\text{Ca}^{2+}$ ) flux across the  
57 eukaryotic plasma membrane (PM), which acts as a barrier between high extracellular and low  
58 cytoplasmic  $\text{Ca}^{2+}$  concentrations. Almost all cells in the animal kingdom regulate the level of  
59 cytosolic  $\text{Ca}^{2+}$  to control their function: a sharp rise in cytosolic  $\text{Ca}^{2+}$  controls enzymatic activity,  
60 protein-protein interactions, gene activation, cell proliferation and apoptosis (Berridge et al., 2000).  
61 One of the primary routes of regulating  $\text{Ca}^{2+}$  entry in non-excitabile cells is via  $\text{Ca}^{2+}$  release-  
62 activated  $\text{Ca}^{2+}$  (CRAC) channels (Parekh and Putney, 2005). Opening of CRAC channels at the  
63 cell surface causes a rapid increase of cytosolic  $\text{Ca}^{2+}$ , which activates many important signalling  
64 pathways, the most studied being in the adaptive immune system. The pore-forming subunits of  
65 CRAC channels are Orai proteins (Feske et al., 2006; Prakriya et al., 2006; Vig et al., 2006; Zhang  
66 et al., 2006). Orai1, the founding and most ubiquitously expressed member of the family, was  
67 originally identified as a genetic cause of severe combined immunodeficiency in humans, and  
68 plays essential roles in T cell immunity (Feske et al., 2006).

69

70 CRAC channel activity must be transient and tightly controlled to prevent aberrant signalling.  
71 Indeed, leaky or defective CRAC channel activity is a direct cause of a group of diseases  
72 collectively referred to as channelopathies (Feske, 2010). CRAC channels are gated by the store-  
73 operated  $\text{Ca}^{2+}$  entry signalling pathway, in response to the stimulated release of stored  
74 endoplasmic reticulum (ER)  $\text{Ca}^{2+}$  by phospholipase C signalling (Hogan and Rao, 2015; Prakriya  
75 and Lewis, 2015). The consequent reduction of ER  $\text{Ca}^{2+}$  is sensed by the ER-resident membrane  
76 protein Stim1 (Hogan and Rao, 2015), resulting in its interaction with Orai1 at PM-ER contact sites,  
77 CRAC channel opening, and the influx of extracellular  $\text{Ca}^{2+}$ . Channel opening relies both on Orai1  
78 multimerisation into a pore-forming hexameric unit, and a concerted set of conformational changes  
79 (Hou et al., 2012; Cai et al., 2016; Hou et al., 2018). The main interaction with the cytoplasmic  
80 domain of Stim1 occurs via the C-terminal cytoplasmic domain of Orai1, which is anchored to the

81 membrane by its fourth transmembrane domain (TMD) (Park et al., 2009). This interaction triggers  
82 allosteric activation and opening of CRAC channels (Yeung et al., 2019). Importantly, the correct  
83 stoichiometry between Orai1 and Stim1 is essential for normal store-operated  $\text{Ca}^{2+}$  entry (Mercer  
84 et al., 2006; Peinelt et al., 2006; Soboloff et al., 2006; Scrimgeour et al., 2009; Hoover and Lewis,  
85 2011; Yeh et al., 2019). Overall, Stim1 binding and trapping of Orai1 at PM-ER contact sites is the  
86 rate-limiting step in CRAC channel activation and is therefore a major regulatory switch for  $\text{Ca}^{2+}$   
87 influx and downstream signalling.

88  
89 One class of enzymes that has the capacity to be involved in regulating the signalling  
90 function of integral membrane proteins by inactivation or degradation are the intramembrane  
91 proteases, which use their active sites in the lipid bilayers of cell membranes to cleave TMDs of  
92 substrates. Most known functions of intramembrane proteases are to release signalling domains  
93 from membrane-tethered precursors, thereby triggering a signalling event. However, a wider range  
94 of roles is becoming apparent, including participating in some forms of ER-associated degradation  
95 (Fleig et al., 2012). Rhomboids are evolutionarily widespread intramembrane serine proteases.  
96 Despite extensive study and well-understood functions in several species (Freeman, 2014), and  
97 some scattered knowledge of their mammalian function (Lohi et al., 2004; Adrain et al., 2011; Fleig  
98 et al., 2012; Johnson et al., 2017) a comprehensive understanding of their physiological  
99 importance in mammals has been hampered by a lack of validated substrates (Lastun et al., 2016).  
100 To date, most identified rhomboid substrates are type I, single-pass transmembrane proteins. One  
101 feature that appears to be common to many intramembrane protease substrates is helical  
102 instability in transmembrane segments (Ye et al., 2000; Lemberg and Martoglio, 2002; Urban and  
103 Freeman, 2003), often created by the presence of helix-breaking residues such as prolines or  
104 glycines. The importance of this feature to rhomboid recognition is highlighted not only by their  
105 conservation and functional necessity, but also by the observation that otherwise uncleavable  
106 TMDs can be converted into rhomboid substrates by the introduction of a proline residue (Moin  
107 and Urban, 2012). This raises the possibility that rhomboids may have originally evolved to  
108 recognise non-canonical transmembrane helices.

109  
110 Our overall goal is to discover the conceptual and mechanistic themes associated with  
111 rhomboid intramembrane proteolysis and to uncover their physiological roles in mammals. Here,  
112 through a bioinformatics-led cell biological screen, we identify the fourth TMD of Orai1 as a  
113 substrate for the PM localised rhomboid protease RHBDL2. We show that proteolysis of Orai1 by  
114 RHBDL2 sharpens the precision of store-operated  $\text{Ca}^{2+}$  entry by preventing stimulus-independent  
115 CRAC channel activation and inflammatory cytokine expression in unstimulated cells.  
116 Mechanistically, RHBDL2 prevents this inappropriate signalling by conformational selection of the  
117 activated form of Orai1. The pathophysiological importance of this mechanism is highlighted by our



118 demonstration that an activating disease-associated proline-to-leucine mutation in Orai1 TMD4  
119 prevents RHBDL2 recognition, and severe defects in primary T cell activation occur upon RHBDL2  
120 loss. We propose that conformational surveillance of polytopic proteins may represent an ancient  
121 rhomboid protease activity that could predate its better-known roles in the cleavage and  
122 extracellular release of signalling molecules.

123

## 124 **Results**

125

### 126 **Orai1 is an RHBDL2 substrate**

127 To discover new substrates for the rhomboid intramembrane protease, RHBDL2, we used a  
128 bioinformatic approach, followed by functional validation with a cell-based assay. We focused on  
129 three characteristics of known rhomboid substrates: their TMDs have a type I orientation (NH<sub>2</sub>-out,  
130 COOH-in), many contain extracellular EGF-like domains and, like substrates of intramembrane  
131 proteases in general, they often contain helix-destabilising amino acids (Freeman, 2014).  
132 Therefore, we identified candidates by the presence of extracellular EGF domains and/or through  
133 profile-profile alignments with the online server HHpred (Zimmermann et al., 2018) to find type I  
134 TMDs that have structural similarity to one of the best characterised rhomboid substrates,  
135 *Drosophila melanogaster* Spitz (Freeman, 2014).

136

137 The top bioinformatic TMD hits (approximately 175, **Table S1**) were inserted into a reporter  
138 that was co-expressed in cells with RHBDL2, so that RHBDL2-dependent cleavage leads to  
139 accumulation of extracellular alkaline phosphatase (AP) (**Figure 1A; left**), which can be detected  
140 using a colorimetric phosphatase assay. As a positive control, we used the TMD of Spitz, which  
141 can be cleaved by RHBDL2 (**Figure 1B, Figure S1A**) (Urban and Freeman, 2003; Strisovsky et  
142 al., 2009). Among the strongest validated hits, we found the fourth TMD of all three members of  
143 the Orai family of Ca<sup>2+</sup> channels (**Figure 1A, 1C**). The cleavage required the catalytic serine  
144 residue of RHBDL2, as well as the hallmark rhomboid WR motif in the L1 loop that connects TMD1  
145 and TMD2 (**Figure 1D**) (Lemberg and Freeman, 2007).

146

147 We tested whether RHBDL2 could cleave full length Orai1, which unlike most known  
148 rhomboid substrates is a polytopic protein (**Figure 1A; E'**). Upon expression with RHBDL2, full  
149 length Orai1 and its short isoform (Orai1 $\beta$ ) were cleaved into two fragments of molecular weights  
150 that confirmed cleavage within the fourth TMD (**Figure 1E**). Immunofluorescent labelling showed  
151 that cleavage led to Orai1 internalisation from the PM, suggesting that it was degraded as a  
152 consequence of cleavage (**Figure S1B**). Accordingly, treatment of cells with Bafilomycin A1 – a  
153 lysosomal degradation inhibitor – increased the level of the N- and C-terminal Orai1 cleavage  
154 products (**Figure 1E**). Rhomboid substrates are normally cleaved between amino acids with small

155 side chains, and bulky residues at the cleavage site often render them uncleavable (Urban and  
156 Freeman, 2003). HHpred-generated alignments between TMD4 of Orai1 and the Spitz TMD  
157 showed a perfect alignment of the alanine-serine cleavage site in Spitz with alanine-238/serine-  
158 239 in Orai1 (Strisovsky et al., 2009) (**Figure S1C**). Consistent with the expectation that they  
159 comprise the site of Orai1 cleavage, both A238F and S239F mutations blocked RHBDL2-  
160 dependent proteolysis of Orai1 TMD4 (**Figure S1D**). Overall, these results confirm that the fourth  
161 TMD of Orai1 is a *bona fide* substrate of RHBDL2, and that cleavage triggers subsequent Orai1  
162 degradation in lysosomes.

163

#### 164 **RHBDL2 controls CRAC channel activity**

165 The fourth TMD of Orai1 both anchors the cytoplasmic C-terminal Stim-interacting domain and is  
166 proposed to be central to the conformational changes that initiate CRAC channel opening (Park et  
167 al., 2009; Yeung et al., 2019) (**Figure 2A**). We therefore tested the effect of RHBDL2 expression  
168 on endogenous store-operated  $Ca^{2+}$  entry by monitoring cytosolic  $Ca^{2+}$  with the reporter dye Fura-  
169 2. Signalling was triggered by thapsigargin treatment, which depletes ER  $Ca^{2+}$ , followed by addition  
170 of physiological levels of extracellular  $Ca^{2+}$ . We found that RHBDL2 expression reduced store-  
171 operated  $Ca^{2+}$  entry by ~50%, a level similar to that observed upon Orai1 depletion by siRNA  
172 (**Figure 2B-2D**). In these standard assays, cytosolic  $Ca^{2+}$  reflects a balance of  $Ca^{2+}$  influx and  
173 efflux, thus making it formally possible that the observed difference was not the direct result of  
174 altered CRAC channel activity, but instead accelerated  $Ca^{2+}$  efflux by PM  $Ca^{2+}$ -ATPases. To  
175 discriminate between these two scenarios, we assayed influx of barium ions ( $Ba^{2+}$ ), which can be  
176 transported through CRAC channels but cannot be pumped out of the cell by PM  $Ca^{2+}$ -ATPases  
177 (Hoth, 1995; Bakowski and Parekh, 2007). Again, there was a ~50% diminished influx of  $Ba^{2+}$  after  
178 thapsigargin treatment, supporting the conclusion that RHBDL2 expression prevented CRAC  
179 channel activity directly (**Figure 2E, 2F**). To investigate the functional correlate of this effect, we  
180 examined the regulated translocation of the transcription factor NFAT (nuclear factor of activated T  
181 cells), which is triggered by CRAC channel activity (Hogan et al., 2010; Kar et al., 2011; Kar and  
182 Parekh, 2013). Expression of RHBDL2 – but not the related rhomboid protease RHBDL4 –  
183 inhibited GFP-NFAT nuclear translocation upon treatment with thapsigargin (from ~98% nuclear  
184 NFAT upon thapsigargin treatment in control to ~43% in RHBDL2 expressing cells) (**Figure 2G**).  
185 We conclude that RHBDL2 cleavage of Orai1 prevents both endogenous CRAC channel activity  
186 and the stimulated nuclear translocation of NFAT.

187

188 RHBDL2 expression inhibits CRAC channel signalling, but is cleavage of Orai1 a  
189 physiologically meaningful event? To address this, we tested whether loss of RHBDL2 function  
190 had a physiological effect on  $Ca^{2+}$  signalling and the outputs of store-operated  $Ca^{2+}$  entry. We first  
191 used HEK293 mutant cells, in which the region encoding the catalytic histidine in RHBDL2 was

192 deleted by CRISPR-Cas9 editing (**Figure S2A, B**). These cells displayed reduced endogenous  
193 store-operated  $\text{Ca}^{2+}$  entry across a range of physiological extracellular  $\text{Ca}^{2+}$  concentrations (**Figure**  
194 **3A-3E**). We also assayed the effect of RHBDL2 depletion in HaCaT keratinocytes (**Figure 3F**).  
195 Using two different siRNAs, there was a clear defect in store-operated  $\text{Ca}^{2+}$  entry when RHBDL2  
196 was depleted (**Figure 3G-3I**), further demonstrating that RHBDL2 does indeed regulate  
197 endogenous CRAC channel activity.

198

### 199 **RHBDL2 is required for human T cell activation**

200 CRAC channels participate in the primary activation of T cells by antigen presenting cells, and are  
201 thus centrally involved in T cell immunity (Feske, 2007). We therefore isolated primary CD4-  
202 positive T cells from two healthy human donors and asked whether RHBDL2 depletion (**Figure 4A**  
203 **and Figure S3A**) affected their activation by anti-CD3 crosslinking of the T cell receptor, a widely  
204 used method of mimicking T cell interactions with antigen presenting cells. Using surface CD69  
205 expression as a readout (Ziegler et al., 1994), we found T cell activation was reproducibly defective  
206 across three experiments (**Figure 4B and Figure S3B**; *EC50 values of anti-CD3 for each shRNA*  
207 *are indicated in the dashed box*). We also directly measured CRAC channel activity in these  
208 RHBDL2-depleted T cells and found severely reduced store-operated  $\text{Ca}^{2+}$  entry (**Figure 4C-4E**).  
209 Combined, our results not only demonstrate that the role of RHBDL2 in controlling CRAC channel  
210 activity is essential for normal store-operated  $\text{Ca}^{2+}$  entry, but also that this has a profound effect on  
211 human T cell activation.

212

### 213 **RHBDL2 controls signalling by optimising stoichiometry between Orai1 and Stim1**

214 Superficially, the loss of RHBDL2 might be expected to lead to higher Orai1 levels, more CRAC  
215 channels and therefore enhanced store-operated  $\text{Ca}^{2+}$  entry. We therefore sought to explain the  
216 counterintuitive result that loss of RHBDL2 led to decreased store-operated  $\text{Ca}^{2+}$  entry. We began  
217 by analysing the subcellular localisation of Orai1 in RHBDL2-depleted cells (**Figure 5A**). This  
218 experiment provided three important insights. First, Orai1 targeting to the PM was unaffected.  
219 Second, Orai1 levels at the PM appeared elevated in RHBDL2-depleted cells. This was further  
220 confirmed by cell surface biotinylation experiments, which showed a specific elevation of PM Orai1  
221 levels upon depletion of RHBDL2 (**Figure S4**). Combined, this ruled out the possibility that the  
222 store-operated  $\text{Ca}^{2+}$  entry phenotype was due to a failure in trafficking of Orai1 to the PM. And  
223 third, we found that Orai1 did not accumulate in LAMP1-positive lysosomes, confirming that this  
224 increased pool of Orai1 at the PM upon knockdown of RHBDL2 was not a secondary consequence  
225 of defective lysosomal function. Consistent with its role in cleaving and targeting Orai1 for  
226 degradation, depletion of RHBDL2 – but not other rhomboids RHBDL1, 3 or 4 – led to an increase  
227 in endogenous full length Orai1 and its shorter isoform, Orai1 $\beta$  (**Figure 5B, 5C**). Plasmid-borne  
228 Orai1 also accumulated specifically in RHBDL2 depleted cells, clearly demonstrating that

229 transcriptional changes are not responsible for increased Orai1 protein (**Figure 5D**). Overall, these  
230 data indicate that RHBDL2 loss caused elevated levels of PM Orai1, but further prompted the  
231 question of how this led to decreased store-operated  $\text{Ca}^{2+}$  entry.

232

233 The answer to this question was provided by the fact that the correct stoichiometry between  
234 Orai1 and Stim1 is essential for the store-operated  $\text{Ca}^{2+}$  entry pathway (**Figure 2A**): Stim1 levels  
235 are rate limiting for CRAC channel activation, and excess Orai1 has a dominant-negative effect on  
236 store-operated  $\text{Ca}^{2+}$  entry (Mercer et al., 2006; Peinelt et al., 2006; Soboloff et al., 2006;  
237 Scrimgeour et al., 2009; Hoover and Lewis, 2011; Yeh et al., 2019). We found that RHBDL2  
238 depletion caused PM Orai1 levels to increase, with unchanged or decreased Stim1 levels (**Figure**  
239 **5B-5D**). We therefore predicted that if compromised stoichiometry was the cause of the observed  
240 store operated  $\text{Ca}^{2+}$  entry defects, overexpression of Stim1 in RHBDL2 KO cells should rescue the  
241 phenotype by allowing production of functional CRAC channels and elevated store-operated  $\text{Ca}^{2+}$   
242 entry. Accordingly, expression of Stim1 not only rescued the defect in store-operated  $\text{Ca}^{2+}$  entry,  
243 but significantly enhanced its rate compared to wild-type cells expressing the same construct  
244 (**Figure 5E, 5F**). This result indicates that the defects in store-operated  $\text{Ca}^{2+}$  entry caused by  
245 RHBDL2 loss are caused by an imbalance in Orai1:Stim1 stoichiometry. An important implication  
246 of this result is worth emphasising: the Orai1 that accumulates in the absence of RHBDL2 is  
247 functionally competent. This rules out another possible role for RHBDL2, that it might act in a  
248 misfolded protein quality control mechanism to degrade defective Orai1, thereby protecting the  
249 integrity of CRAC channels. Overall, these data show that RHBDL2 cleavage and subsequent  
250 degradation of Orai1 acts to maintain an optimal stoichiometry between Orai1 and Stim1.

251

### 252 **RHBDL2 prevents inappropriate CRAC channel activation in resting cells**

253 We next questioned the biological context of Orai1 cleavage by RHBDL2. We noted that in  
254 unstimulated cells, PM Orai1 protein levels increased upon depletion of RHBDL2 (**Figure 5A and**  
255 **Figure S4**), indicating that cleavage was not dependent on store-operated  $\text{Ca}^{2+}$  entry. We  
256 therefore hypothesised that the role of RHBDL2 cleavage of Orai1 is to prevent CRAC channel  
257 activity in the absence of stimulation, i.e. that RHBDL2 maintains the correct baseline threshold  
258 level of CRAC channel signalling. NFAT nuclear translocation is highly sensitive to low-level local  
259 CRAC channel activation (Kar et al., 2011; Kar and Parekh, 2013). As NFAT translocation is  
260 prevented by RHBDL2 expression (**Figure 2G**), we reasoned that if RHBDL2 loss led to a basal  
261 elevation in CRAC channel activity in unstimulated cells, NFAT targets would be upregulated.  
262 Strikingly, we found that RHBDL2 depletion in HaCaT cells led to a 19-fold upregulation of the  
263 expression of the inflammatory cytokine TNF, one of the major NFAT responsive genes (Rao et al.,  
264 1997) (**Figure 6A; 72 hours siRNA**). Notably, cytokines not dependent on NFAT, such as IL-6,  
265 were not affected. We confirmed that the elevated TNF expression was indeed due to upregulated

266 NFAT, as it was inhibited by treatment with cyclosporin A, a widely used inhibitor of NFAT  
267 signalling (Rao et al., 1997) (**Figure 6B**). Together, these data demonstrate that RHBDL2 is  
268 needed to prevent inappropriate NFAT signalling, which is a major downstream effector of CRAC  
269 channels.

270  
271 We next examined whether excess signalling was caused by stimulus-independent,  
272 stochastic Stim1 activation of CRAC channels. This was prompted by two observations. First, PM-  
273 ER contact sites stably exist regardless of Stim1 activation (Wu et al., 2006; Orci et al., 2009), and  
274 Stim1 targeting to PM-ER contact sites is Orai1-independent (Liou et al., 2007; Park et al., 2009).  
275 Second, Stim2, which is prelocalised at PM-ER contact sites, can promote Stim1 translocation in  
276 conditions of incomplete depletion of ER Ca<sup>2+</sup> stores (Burdakov and Verkhratsky, 2006; Brandman  
277 et al., 2007; Subedi et al., 2018). We therefore hypothesised that the unwanted CRAC channel  
278 activity against which RHBDL2 protects cells may be stochastic, triggered by random Stim1/Orai1  
279 interaction in the absence of stimulation, rather than being actively triggered by complete depletion  
280 of ER Ca<sup>2+</sup>. To test this idea, we fused the BirA\* biotin ligase to the cytoplasmic domain of Stim1,  
281 the basis of an assay to identify Orai1 molecules that have previously encountered Stim1. We then  
282 asked whether this subset were preferentially cleaved by RHBDL2 (**Figure 6C**). At rest, in  
283 unstimulated wild type cells, a small proportion of Orai1 ( $0.38 \pm 0.13\%$  of the total pool after 72  
284 hours of expression) does indeed encounter Stim1 (**Figure 6D**; DOX). Importantly, this pool of  
285 Orai1 was cleaved in wild-type cells in a RHBDL2-dependent manner (**Figure 6D- N- and C-**  
286 *terminal cleavage products in WT vs KO*; **Figure S2C-D**). Blocking lysosomal degradation  
287 increased these cleavage products. These cleavage products were never detected in total lysates,  
288 indicating the specificity of RHBDL2 for the small pool of Orai1 that had inappropriately  
289 encountered Stim1 (**Figure 6E**). The central message of this experiment is that Orai1 was cleaved  
290 by endogenous RHBDL2, and subsequently degraded in lysosomes, only after stimulus-  
291 independent engagement with Stim1.

292  
293 Secondly, we noted that full length Orai1 (i.e. uncleaved by RHBDL2) that had previously  
294 encountered Stim1-BirA\* was also stabilised by bafilomycin treatment (**Figure 6D**), indicating it too  
295 was degraded in lysosomes. Intriguingly, this did not occur in cells lacking RHBDL2 (**Figure 6D**,  
296 **6F- biotinylated O1 levels in WT versus R2 KO**). One possible interpretation of this phenomenon is  
297 that cleavage of one or two copies of Orai1 is sufficient to destabilise larger homomeric Orai1  
298 complexes, leading to degradation of both full-length and cleaved protein.

299  
300 Overall, these results define a central conclusion of our work: that RHBDL2 promotes the  
301 cleavage and subsequent lysosomal degradation of only those Orai1 molecules that have  
302 previously encountered Stim1. In unstimulated cells, this population of molecules is small but, as



303 shown in Figures 4B and 6B, they nevertheless trigger a dangerous level of unwanted  $\text{Ca}^{2+}$   
304 signalling if allowed to accumulate. Without RHBDL2 acting as a brake on this stochastic CRAC  
305 channel activity, T cell activation and inflammatory cytokine expression are both severely  
306 defective.

307

### 308 **RHBDL2 recognition of Orai1 is conformationally determined**

309 The proposed model of RHBDL2 patrolling the PM to destroy inappropriately active CRAC  
310 channels suggests that the protease may preferentially recognise active forms of Orai1, engaged  
311 by Stim1. Such conformational selectivity of rhomboid proteases has not previously been reported.  
312 To address the idea, we capitalised on recent structure-function data that provides a detailed  
313 understanding of the contributions of specific Orai1 TMD amino acids to overall CRAC channel  
314 architecture and activity (Yamashita et al., 2017; Hou et al., 2018). Mutation of histidine-134 in  
315 Orai1 to threonine, valine or serine activates Orai1 (Yeung et al., 2018), as do other mutations  
316 such as F99Y, V102A and P245L (Nesin et al., 2014; Palty et al., 2015). Conversely, other Orai1  
317 TMD mutations have a profound inactivating effect (G98C (Yamashita et al., 2017), R91W (Feske  
318 et al., 2006)) and H134W (Yeung et al., 2018)). We compared binding of RHBDL2-SA (the serine-  
319 to-alanine catalytic mutant, which binds stably to substrates) to these different Orai1 activity  
320 mutants. There was a clear correlation between RHBDL2-SA binding and Orai1 activity: RHBDL2  
321 bound strongly to Orai1 H134S, the mutant that is closest in its properties to a Stim1-gated CRAC  
322 channel (Yeung et al., 2018). In contrast, inactive mutants of Orai1, such as H134W, showed very  
323 weak binding to RHBDL2 (**Figure 7A, 7B**). This demonstrated that RHBDL2 exhibits selectivity for  
324 active forms of Orai1.

325

326 We next questioned whether RHBDL2 recognises the active form of Orai1 through  
327 recognition of activity-dependent conformational changes. The structure of the active *Drosophila*  
328 Orai1 H134A mutant also mimics the conformation of Orai1 in complex with Stim1, showing the  
329 major displacement of TMD4, which anchors the Stim1 interacting cytoplasmic domain (Hou et al.,  
330 2018) (**Figure 7C**). This activating displacement pivots on a flexible hinge generated by a proline  
331 residue in TMD4 (proline-245 in human Orai1) (Hou et al., 2012; Hou et al., 2018). Mutation of this  
332 hinge proline is also the cause of the rare human Stormorken syndrome, in which the CRAC  
333 channel has excess activity (Nesin et al., 2014). Since helical instability, often conferred by  
334 prolines, is a major determinant of rhomboid substrates (Urban and Freeman, 2003; Moin and  
335 Urban, 2012), we examined the role of proline-245 in RHBDL2 recognition of Orai1. Unlike all other  
336 active Orai1 mutants we tested, P245L did not show enhanced binding to RHBDL2-SA, indicating  
337 that, even when the molecule is in a locked-open state, proline-245 is necessary for RHBDL2  
338 recognition (**Figure 7D**). Moreover, when combined with the activating G98S mutation (Endo et al.,  
339 2015), which itself strongly promotes RHBDL2 binding, the P245L mutation prevented recognition

340 (Figure 7D, 7E). Finally, RHBDL2 proteolysis of Orai1 TMD4 was inhibited by the P245L mutation  
341 (Figure 7F), confirming that RHBDL2 recognition and cleavage of Orai1 requires proline-245. This  
342 demonstrates that loss of helical instability in TMD4, which activates Orai1 and causes Stormorken  
343 syndrome, also blocks recognition by rhomboid and thus prevents its ability to perform  
344 conformational surveillance.

345

346

## 347 Discussion

348

349 The results we report here uncover a new role for rhomboid proteases in regulated degradation of  
350 membrane proteins. RHBDL2 patrols the PM to seek and destroy inappropriately activated CRAC  
351 channels in unstimulated cells, in order to prevent inappropriate signalling such as NFAT-  
352 dependent expression of the proinflammatory cytokine, TNF. This maintains a low baseline level of  
353 Ca<sup>2+</sup> influx, which is essential to ensure fully regulated switch-like store-operated Ca<sup>2+</sup> entry and T  
354 cell activation. It is notable that RHBDL2 has been shown to diffuse in the plane of the membrane  
355 at exceptionally high speeds, faster than any known polytopic membrane protein (Kreutzberger et  
356 al., 2019). This property, which appears to be mediated by mismatch between the thickness of the  
357 lipid bilayer and the shorter than expected hydrophobic domain of the rhomboid fold, makes  
358 RHBDL2 particularly well suited to this seek-and-destroy function. We discovered Orai1 using a  
359 combined bioinformatic and cell-based screen for new substrates of the PM rhomboid RHBDL2.  
360 This approach identified specifically the fourth TMD of Orai1 (as well as Orai2 and Orai3).  
361 Combined with the recent discovery of a polytopic substrate for the bacterial rhomboid protease  
362 YqgP (Began et al., 2020), the universe of possible rhomboid substrates has therefore been  
363 expanded beyond single pass TMD proteins, to now encompass the very large class of polytopic  
364 membrane proteins, which includes channels, GPCRs and many other pharmacologically  
365 significant targets.

366

367 Prolines are often determinants of rhomboid substrates, because of their property of  
368 destabilising or introducing a kink into a transmembrane helix (Urban and Freeman, 2003). This  
369 partial disruption is needed to allow the active site of the enzyme access to the cleavable peptide  
370 bond, which is otherwise shielded by hydrogen bonding inherent to the alpha helix. Our data  
371 elaborate on this basic principle of rhomboid substrate recognition by identifying the first case in  
372 which a rhomboid, or indeed any intramembrane protease, shows conformational specificity in  
373 substrate recognition. RHBDL2 monitors the conformational dynamics of Orai1. Proline-245 of  
374 Orai1 contributes the flexibility to the fourth TMD that is essential for transducing the binding of  
375 Stim1 into the allosteric changes that open the CRAC channel. This same proline-245 hinge  
376 mechanism determines recognition by RHBDL2. The ability to distinguish active from inactive

377 Orai1 underlies the ability of RHBDL2 to seek and cleave only activated CRAC channels, and is  
378 therefore central to the mechanism of maintaining low basal signalling in unstimulated cells.  
379 Interestingly, transmembrane helix instability is a common characteristic of most intramembrane  
380 protease substrates (Ye et al., 2000; Lemberg and Martoglio, 2002; Urban and Freeman, 2003),  
381 which raises the possibility that other intramembrane proteases may perform a similar function.

382

383 Our model that RHBDL2 acts to prevent inappropriate CRAC channel activity, begs the  
384 question of how stimulated activity occurs when store operated  $\text{Ca}^{2+}$  entry appropriately triggers  
385 signalling. What prevents RHBDL2 from blocking signalling in a scenario when signalling is  
386 needed? We propose three possible answers to explain this. First, store operated  $\text{Ca}^{2+}$  entry leads  
387 to molecular crowding of CRAC channels in the membrane, with an estimated ~40 nm distance  
388 between channels (Ji et al., 2008). Such a high density of CRAC channels may physically restrict  
389 RHBDL2 access to substrate TMDs within the plane of the membrane. Second, in unstimulated  
390 cells only a small proportion of Orai1 encounters Stim1, allowing the low level of RHBDL2  
391 expressed in most cells to be sufficient to prevent unstimulated signalling (our observations, and  
392 <https://gtexportal.org/home/>). In contrast, when store-operated  $\text{Ca}^{2+}$  entry is triggered, the majority  
393 of Orai1 is engaged, and this may simply overwhelm RHBDL2 surveillance. A third more  
394 speculative possibility is that when CRAC channels are activated, RHBDL2 function is inhibited by  
395 an increase in cytoplasmic  $\text{Ca}^{2+}$ . Significantly, there is precedent for rhomboid proteases being  
396  $\text{Ca}^{2+}$ -sensitive (Baker and Urban, 2015), so this could in principle provide a neat regulatory  
397 mechanism to prevent Orai1 cleavage when store operated  $\text{Ca}^{2+}$  entry is triggered.

398

399 CRAC channel activity is a major mechanism for regulating cytoplasmic  $\text{Ca}^{2+}$  levels in non-  
400 excitable cells and therefore plays an important role in a wide range of biological contexts, most  
401 notably during the activation of T cells when they engage with antigen presenting cells (Feske,  
402 2007). Although store-operated  $\text{Ca}^{2+}$  entry, dependent on phospholipase C activity, is a tightly  
403 regulated process, even highly evolved biological control processes are not perfect. The events  
404 downstream of CRAC channels are biologically potent and, if unchecked, they cause  
405 pathophysiological dysregulation and channelopathies (Feske, 2010). Accordingly, our data show  
406 that the loss of RHBDL2 from cells leads to significantly elevated levels of Orai1, and consequent  
407 dysregulated T cell activation and inflammatory cytokine expression. Significantly, the major  
408 determinant of RHBDL2 recognition of Orai1, proline-245, is the causative mutation of the rare  
409 inherited Stormorken Syndrome, which is characterised by excess CRAC channel activity (Nesin et  
410 al., 2014). The aetiology of this disease, and perhaps others caused by excess CRAC channel  
411 activity, is therefore likely to be related to failure of RHBDL2 surveillance of Orai1.

412



413           In conclusion, the identification of Orai1 as a substrate of RHBDL2 highlights two novel  
414 themes. It substantially advances our knowledge of rhomboid proteases by expanding the universe  
415 of potential substrates, and by demonstrating the first example of intramembrane proteases  
416 showing conformation-specific substrate recognition, which has significant implications for their  
417 regulatory roles. Our work also develops a theme of regulated protein degradation being used to  
418 sharpen cellular signalling, by ensuring low levels of activity in unstimulated cells. RHBDL2 patrols  
419 the PM, seeking Orai1 molecules in an inappropriately active conformation in resting cells, and  
420 triggering their degradation. Rhomboid proteases are ancient, existing in all kingdoms of life. It is  
421 tempting to speculate that the primordial function of rhomboids may have been to inactivate and  
422 degrade membrane proteins with non-canonical TMDs, perhaps as a quality control function. In  
423 this scenario, it would only have been later, after the appearance of metazoans, when rhomboids  
424 would become responsible for their now well established roles in triggering the release of proteins  
425 that signal between cells.  
426

427 **Acknowledgements**

428

429 We thank members of the Freeman lab for their support and advice during the study, particularly  
430 Fangfang Lu and Nina Jajcanin-Jozic for their feedback on the manuscript. We thank Pedro  
431 Carvalho (Dunn School, Oxford), Tim Levine (Institute of Ophthalmology, UCL) and Francesca  
432 Robertson (Biochemistry Department, Oxford) for critical reading of the manuscript. We also thank  
433 Tim Levine for his guidance with the use of HHpred. We would like to thank Michael van der Weijer  
434 for the generous gift of pLVX plasmids subcloned with zeocin and blasticidin resistance genes. We  
435 gratefully acknowledge the support of Alan Wainman in the light microscopy facility and Michal Maj  
436 in the flow cytometry facility at the Dunn School. This paper was supported by the following grants:  
437 CIU Trust grant to JB. European Regional Development Fund (ERDF/ESF; project no.  
438 CZ.02.1.01/0.0/0.0/16\_019/0000729) to KS. MRC grant (LO1047CX) to ABP. Marie Skłodowska-  
439 Curie fellowship (Horizon 2020 Framework Programme 659166) to AGG. BBSRC Research grant  
440 (BB/RO16771/1) to AGG and MF. Wellcome Trust Senior Investigator Award (101035/Z/13/Z) to  
441 MF.

442

443 **Author Contributions and Declarations of Interest**

444 YY was responsible for design and implementation of all Fura-2/calcium experiments, YY and ABP  
445 analysed these data. LZ contributed to the RHBDL2/Orai1 binding assays. JB conducted all T cell  
446 activation assays, and MHB provided guidance in T cell work its interpretation. NJ and KS made  
447 and provided HaCaT RHBDL2 KO keratinocytes. AGG led the project and performed all other  
448 experiments. AGG and MF conceived the project and wrote the manuscript.

449

450 The authors have no conflict of interest.

451

## 452 Figure Legends

453

### 454 Figure 1

455

456 **Orai1 is an RHBDL2 substrate.** **A.** Scheme of the alkaline phosphatase-transmembrane domain  
457 (AP-TMD) screen. Each AP-TMD (orange) has a signal sequence ensuring their insertion within  
458 the endoplasmic reticulum (ER) and subsequent delivery to the cell surface. Upon co-expression  
459 with RHBDL2 (blue), if AP-TMD is cleaved, it will release AP into the extracellular medium. In the  
460 dashed box (E'), the topology of V5-Orai1 is illustrated, indicating the epitopes recognised by  
461 antibodies used for western blot in panel E. GA = Golgi apparatus. PM = plasma membrane. **B-D.**  
462 HEK293 cells were transfected with pcDNA, 3xHA-RHBDL1-4 or RHBDL2 mutants (S->A, or WR-  
463 >AA) and indicated AP-TMDs for 48 hours. Soluble AP is AP with a signal sequence, but no  
464 transmembrane anchor. Released AP was collected over the final 16 hours of expression. Values  
465 represent the level of released AP/total AP (**B, D**) or in (**C**) these values were converted into a  
466 normalised level of "RHBDL2-stimulated AP release" (for each AP-TMD: AP release upon  
467 RHBDL2 expression was divided by values taken for pcDNA transfected controls, and multiplied  
468 by 100. All values have AP release with pcDNA subtracted, as this release is RHBDL2-  
469 independent). For the AP-TMD screen, n = 2 biological repeats for each AP-TMD. Error bars  
470 indicate standard error of the mean. **E.** Western blots of lysates from HEK293 cells transfected  
471 with V5-Orai1 and indicated RHBDL2 constructs for 48 hours, treated with 100 nM Bafilomycin A1  
472 for 16 hours, and probed with Orai1, V5, HA or beta-actin antibodies. Different full-length forms of  
473 Orai1 (Orai1 $\beta$  arises from alternative start sites methionine-64 or -71 (Fukushima et al., 2012)) and  
474 their cleavage products are indicated by the blue arrowheads.

475

### 476 Figure 2

477

478 **RHBDL2 downregulates CRAC channel activity.** **A.** Overview of the store-operated Ca<sup>2+</sup> entry  
479 pathway. Upon depletion of ER Ca<sup>2+</sup> stores (red dots) by thapsigargin (step 1), Stim1 (green)  
480 oligomerises and extends into ER-PM contact sites. It traps and nucleates Orai1 (orange) into  
481 functional CRAC channels (step 2). For simplicity, Stim1 and Orai1 are illustrated as monomeric,  
482 but upon activation, Stim1 and Orai1 are proposed to oligomerise into dimers and hexamers,  
483 respectively. RHBDL2 (blue) cleaves the fourth transmembrane domain in Orai1, which anchors  
484 the primary carboxy-terminal Stim1-interaction site. **B.** Store-operated Ca<sup>2+</sup> entry is monitored by  
485 cytosolic Fura-2 fluorescence, and compared between control HEK293 cells and those transiently  
486 transfected with GFP-RHBDL2 or Orai1 siRNA. Cells were stimulated with 2 mM thapsigargin in  
487 Ca<sup>2+</sup> free buffer, followed by readmission of 1 mM external Ca<sup>2+</sup>, as indicated. Aggregate data from  
488 cells treated as in **B** are plotted, analysing the peak Ca<sup>2+</sup> level in each condition (**C**) and rate of  
489 Ca<sup>2+</sup> entry (**D**). Each bar in C and D represents between 34 and 68 cells. **E.** Ba<sup>2+</sup> entry is compared  
490 between cells transfected with empty vector or GFP-RHBDL2, after treatment with 2 mM  
491 thapsigargin in Ba<sup>2+</sup>/Ca<sup>2+</sup> free buffer. **F.** The rate of Ba<sup>2+</sup> entry is plotted, each bar represents  
492 between 12 and 19 cells. For two-tailed t-tests \*\*\* = p<0.001, in comparisons with empty vector  
493 controls. In all bar charts, error bars indicate standard error of the mean. **G.** PFA-fixed HEK293  
494 cells transfected with NFAT1(1-460)-GFP and indicated RHBDL2/4 constructs were treated with  
495 DMSO or 1 mM thapsigargin for 45 minutes. Single confocal sections of EGFP fluorescence are  
496 depicted with inverted grayscale lookup tables. Under each image, the number of cells displaying  
497 nuclear enriched NFAT-GFP is indicated. Scale bar = 10  $\mu$ m.

498

### 499 Figure 3

500

501 **RHBDL2 is required for normal store-operated Ca<sup>2+</sup> entry.** **A-C.** Store-operated Ca<sup>2+</sup> entry is  
502 monitored by cytosolic Fura-2 fluorescence, and compared between wild type and RHBDL2 mutant  
503 HEK293 cells (CRISPR/Cas9-based deletion of the essential catalytic histidine, termed R2 KO).  
504 Cells were stimulated with 2 mM thapsigargin in Ca<sup>2+</sup> free buffer, followed by readmission of 2, 1 or  
505 0.5 mM external Ca<sup>2+</sup>, as indicated. Aggregate data from cells treated as in **A-C** are plotted,  
506 analysing the peak Ca<sup>2+</sup> level in each condition (**D**) and rate of Ca<sup>2+</sup> entry (**E**). Each bar in **D** and **E**

507 represents between 11 and 35 cells. **F.** Western blots of HaCaT keratinocytes treated with  
508 RHBDL1 or RHBDL2 siRNAs for 96 hours, probed with RHBDL2 and beta-actin antibodies. **G.**  
509 Store-operated  $\text{Ca}^{2+}$  entry is monitored via cytosolic Fura-2 fluorescence, and compared between  
510 scrambled siRNA and RHBDL2 siRNA-treated cells. Cells were stimulated with 2 mM thapsigargin  
511 in  $\text{Ca}^{2+}$  free buffer, followed by readmission of 2 mM external  $\text{Ca}^{2+}$ . Aggregate data from cells  
512 treated as in **G** are plotted, analysing the peak  $\text{Ca}^{2+}$  level in each condition (**H**) and rate of  $\text{Ca}^{2+}$   
513 entry (**I**). Each bar in H and I represents between 22 and 36 cells. For two-tailed t-tests \* =  $p < 0.05$ ,  
514 \*\* =  $p < 0.01$  and \*\*\* =  $p < 0.001$ , in comparisons with wild type or scrambled siRNA controls. In all  
515 bar charts, error bars indicate standard error of the mean.  
516

#### 517 **Figure 4**

518  
519 **RHBDL2 is required for human T cell activation. A.** TaqMan assays for RHBDL2 mRNA levels  
520 in T cells transduced with virus encoding control or RHBDL2 shRNAs. Error bars represent RQ  
521 standard error. **B.** T cell activation was measured by quantification of surface CD69 expression by  
522 FACS. CD69 expression is compared between control and RHBDL2 shRNA transduced primary  
523 CD4-positive T cells after stimulation with varying doses of platebound CD3. Each trace represents  
524 three biological replicates. In the dashed box, the calculated EC50 of anti-CD3 for each shRNA  
525 condition is indicated. Error indicates standard error of the mean. **C.** Store-operated  $\text{Ca}^{2+}$  entry is  
526 monitored by cytosolic Fura-2 fluorescence, and compared between control and RHBDL2 shRNA  
527 transduced T cells. T cells were stimulated with 2 mM thapsigargin in  $\text{Ca}^{2+}$  free buffer, followed by  
528 readmission of 2 mM external  $\text{Ca}^{2+}$ . Aggregate data from T cells treated as in **C** are plotted,  
529 analysing the peak  $\text{Ca}^{2+}$  level in each condition (**D**) and rate of  $\text{Ca}^{2+}$  entry (**E**). Each bar in D and E  
530 represents between 34 and 45 cells. For two-tailed t-tests \*\*\* =  $p < 0.001$ , in comparisons with  
531 control shRNA transduced T cells. Error bars represent standard error of the mean.  
532

#### 533 **Figure 5**

534  
535 **RHBDL2 controls signalling by optimising stoichiometry between Orai1 and Stim1. A.**  
536 Immunofluorescent labelling of Orai1-myc and LAMP1 (to mark lysosomes) in HEK293 cells  
537 transfected with control or RHBDL2 siRNA for 72 hours, and transfected with Orai1-myc 24 hours  
538 prior to fixation. Individual confocal sections through the nucleus are depicted. **B.** Western blots of  
539 HaCaT lysates after cells were treated with control or RHBDL1-4 siRNAs for 96 hours, labelled for  
540 endogenous Orai1, Stim1 and beta-actin. Full length Orai1 (FL) and Orai1 $\beta$  (FL $\beta$ ) are indicated by  
541 arrowheads. Orai1 $\beta$  arises from alternative start sites methionine-64 or -71 (Fukushima et al.,  
542 2012). **C.** Quantification of the fold change in Orai1 and Stim1 protein abundance, from three  
543 independent experiments performed as in B. Error bars represent the standard error of the mean.  
544 **D.** Western blots of HEK293T lysates after cells were treated with control or RHBDL1-4 siRNAs for  
545 72 hours, expressing V5-Orai1 for the final 24 hours. Full length Orai1 (FL) and Orai1 $\beta$  (FL $\beta$ ) are  
546 indicated by arrowheads. **E.** Store-operated  $\text{Ca}^{2+}$  entry is compared between wild type (WT) and  
547 RHBDL2 mutant HEK293 cells (CRISPR/Cas9-based deletion of the essential catalytic histidine,  
548 KO) over-expressing Stim1-YFP. Cells were stimulated with 2 mM thapsigargin in  $\text{Ca}^{2+}$  free buffer,  
549 followed by readmission of 2 mM external  $\text{Ca}^{2+}$ . Aggregate data from cells treated as in E are  
550 plotted, analysing the rate of  $\text{Ca}^{2+}$  entry (**F**). Each bar in F represents between 17 and 26 cells. For  
551 two-tailed t-tests \*\* =  $p < 0.001$ , \*\*\* =  $p < 0.001$ , in comparisons with wild type cells. Error bars  
552 represent standard error of the mean.  
553  
554

#### 555 **Figure 6**

556  
557 **RHBDL2 prevents inappropriate CRAC channel activation in resting cells. A-B.** TaqMan  
558 assays for TNF alpha, IL-6 and RHBDL2 (R2) mRNA levels in HaCaT cells treated with control or  
559 RHBDL2 siRNAs for 72 hours (in **A**) or 48 hours (in **B**). Cyclosporin A (1  $\mu\text{m}$ ) was added for the  
560 final 24 hours in B. Error bars represent RQ standard error. Each chart in A and B represents one  
561 of at least four biological replicates. **C.** A scheme of the Stim1-BirA experiment in **D-F**, illustrating  
562 the biotinylation of V5-Orai1 (orange) by Stim1-BirA\* (green) at PM-ER contact sites, and the

563 downstream consequence of RHBDL2 (blue) activity. The epitopes in Orai1 that are recognised by  
564 antibodies used in D-F are shown, as well as the inhibition of downstream lysosomal degradation  
565 by bafilomycin A1 (Baf). Biotin is indicated by green dots. For simplicity, Stim1 and Orai1 are  
566 illustrated as monomeric. **D-E.** Western blots of neutravidin agarose-based biotin captured lysates  
567 from wild type (WT) or RHBDL2 knockout (R2 KO) HaCaT cells. The expression of V5-Orai1 and  
568 Stim1-BirA\* was induced with doxycycline (DOX, 250 µg/ml final) for 96 hours in the presence of  
569 50 µm biotin. Six hours prior to lysis, bafilomycin A1 (BAF, 100 nm final) was added to block  
570 lysosomal degradation. Blots were probed for the N-terminal epitopes or C-terminal epitopes  
571 recognised by V5 and O1 antibodies, respectively. Stim1 and Stim1-BirA\* were probed for using  
572 an anti-Stim1 antibody. Different full length forms of Orai1 (Orai1β arises from alternative start sites  
573 methionine-64 or -71 (Fukushima et al., 2012)) and their cleavage products are indicated by the  
574 blue arrowheads. **F.** Quantification of the increase in full length Orai1 upon bafilomycin treatment  
575 from three replicates of the experiment performed in **D-E.** Error bars indicate standard error of the  
576 mean. For two-tailed t-tests ns = not significant, \*\*\* = p<0.001, for indicated comparisons.  
577

## 578 **Figure 7**

579 **RHBDL2 recognition of Orai1 is conformationally determined.** **A.** HA immunoprecipitates (IP)  
580 and inputs from HEK293 cells transiently expressing 3xHA-RHBDL2 SA and wild type or mutant  
581 V5-Orai for 24 hours were immunoblotted for V5, HA and beta-actin. **B.** Quantification of three  
582 biological replicates of the experiment performed in **A.** **C.** Structures of *Drosophila* Orai WT (left,  
583 PDB: 4hkr) or Orai H134A (right, PDB: 6bbf), highlighting the accessibility of the fourth  
584 transmembrane domain within the membrane, and the large change in conformation around P245  
585 that is associated with CRAC channel activity. **D.** HA immunoprecipitates (IP) and inputs from  
586 HEK293 cells transiently expressing 3xHA-RHBDL2 SA and wild type or mutant V5-Orai for 24  
587 hours were immunoblotted for V5, HA and beta-actin. **E.** Quantification of three biological  
588 replicates of the experiment performed in **D.** **F.** HEK293 cells were transfected with pcDNA, 3xHA-  
589 RHBDL2 or RHBDL2 SA, and AP-TMD4 or AP-TMD P245L from Orai1 for 48 hours. Released AP  
590 was collected over the final 16 hours. Values represent the level of released alkaline  
591 phosphatase/total alkaline phosphatase. Error bars represent standard error of the mean.  
592  
593

## 594 **Figure S1**

595 **Characterisation of RHBDL2 cleavage of Orai1 TMD4.** **A.** HEK293 cells were transfected with  
596 pcDNA, 3xHA-RHBDL2 or RHBDL2 SA, and indicated AP-TMDs for 48 hours. Released AP was  
597 collected over the final 16 hours. Values represent the level of released alkaline phosphatase/total  
598 alkaline phosphatase. n = 2 biological repeats for each AP-TMD. Error bars represent standard  
599 error of the mean. **B.** Immunofluorescent labelling of HA (green) and myc (red) epitopes in  
600 HEK293 cells transfected with Orai1-3xmyc and 3xHA-RHBDL2 24 hours prior to fixation. Nuclear  
601 DNA is labelled with DAPI. Black boxes indicate that this channel was not imaged. Scale bars = 10  
602 µm. Note that internal Orai1 positive structures are only observed upon co-expression with  
603 RHBDL2. **C.** HHpred alignment of the transmembrane domain of *Drosophila* Spitz with that of  
604 TMD4 in mouse Orai1. ss\_pred and confidence is the PSI-PRED secondary structure prediction  
605 and confidence values, indicating alpha-helical structure (*h* = helix, *c* = unstructured). The  
606 consensus line indicates the profile that was generated for the target and the query proteins. The  
607 fourth line indicates which residues align and their similarity ("I" = very good, "+" = good, "." =  
608 neutral and "=" = clash). Residue colours: blue = acidic, red = basic, green = hydrophobic, black =  
609 polar/neutral. **D.** Cells treated as in A, but here the values have been converted into a heat-map.  
610  
611  
612

## 613 **Figure S2**

614 **Generation of a RHBDL2 null cell lines.** **A-B.** Sanger sequencing reads and alignments from WT  
615 HEK293 and R2 KO cells, showing the nucleotides flanking the catalytic histidine (CAC = His) in  
616 RHBDL2. **C.** CRISPR/Cas9 targetting scheme for RHBDL2 in HaCaT cells. **D.** Western blot for  
617 RHBDL2, and its protease activity against a confirmed shed substrate, in wild type HaCaT clones  
618



619 B10 and E7 and knock-out (KO) clones E6 and H9. In Figure 6C-F, only B10 and H9 clones were  
620 used.

621  
622 **Figure S3**

623  
624 **Effect of RHBDL2 depletion on primary T cell activation. A.** TaqMan assays for RHBDL2  
625 mRNA levels in T cells transduced with virus encoding control or RHBDL2 shRNAs. Error bars  
626 represent RQ standard error. **B.** T cell activation was measured by quantification of surface CD69  
627 expression by FACS. CD69 expression is compared between control and RHBDL2 shRNA  
628 transduced primary CD4-positive T cells after stimulation with varying doses of platebound CD3.  
629 Each trace represents three biological replicates. In the dashed box, the calculated EC50 of anti-  
630 CD3 for each shRNA condition is indicated. Error indicates standard error of the mean.

631  
632 **Figure S4**

633  
634 **RHBDL2 controls the cell surface level of Orai1, but not transferrin receptor.** Western blots of  
635 HaCaT lysates and cell surface biotinylation preps after cells were treated with control or RHBDL2  
636 siRNAs for 72 hours, labelled for endogenous Orai1, Transferrin receptor and beta-actin. Full  
637 length Orai1 (FL) and Orai1 $\beta$  (FL $\beta$ ) are indicated by arrowheads. Orai1 $\beta$  arises from alternative  
638 start sites methionine-64 or -71 (Fukushima et al., 2012).

639  
640 **Table S1**

641  
642 **Transmembrane domain sequences used in the screen.** Amino acid sequences of the TMDs  
643 and surrounding regions from indicated proteins that were used in the AP-TMD screen.  
644

## 645 **Experimental procedures**

646

647 **Reagents.** Bafilomycin A1 (catalogue number 19-148), biotin (catalogue number B4639),  
648 blasticidin (catalogue number 15205) and thapsigargin (catalogue number T9033) was purchased  
649 from Sigma Aldrich. Doxycycline was purchased from MP Biomedicals (catalogue number  
650 SKU 0219504405). PNGase F was purchased from New England Biolabs (catalogue number  
651 P0704L). Puromycin was purchased from Gibco (catalogue number A11138-03). Zeocin was  
652 purchased from Invitrogen (catalogue number 2058442). Phosphatase substrate kits containing  
653 PNPP tablets and buffer (catalogue number 37620) were purchased from Thermo Scientific.

654

655 **Antibodies.** The following antibodies were used for western blotting (WB) and  
656 immunofluorescence (IF): mouse anti-beta-actin (Santa Cruz, catalogue number sc-47778; WB  
657 1:2000), mouse anti-HA (ENZO, catalogue number ENZ-ABS120-0200; WB 1:1000), mouse anti-  
658 transferrin receptor (Invitrogen, catalogue number 13-6800; WB 1:1000), rabbit anti-Stim1 (Cell  
659 Signalling Technology, catalogue number 5668S (D88E10); WB 1:2000), rabbit anti-Orai1 (Sigma  
660 Aldrich, catalogue number O8264; WB 1:2500), goat anti-myc tag (Abcam, catalogue number  
661 ab9132; IF 1:2000), rabbit anti-RHBDL2 (Proteintech, catalogue number 12467-1-AP; WB 1:250 –  
662 only detected RHBDL2 in HaCaT lysates), rabbit anti-V5 tag (Cell Signalling Technology,  
663 catalogue number 13202S; WB and IF 1:2000). Corresponding species-specific HRP or  
664 fluorescently coupled secondary antibodies were used from Santa Cruz and Cell Signaling (WB) or  
665 Invitrogen (IF).

666

667 **Molecular biology.** For generation of the AP reporter construct, we PCR amplified sequence  
668 encoding the signal sequence of HB-EGF and alkaline phosphatase, as described originally in  
669 (Sahin et al., 2004), with a pair of restriction enzyme sites (Sall and NotI) that were placed 3' of the  
670 sequence encoding alkaline phosphatase. This was subsequently cloned between the EcoRI and  
671 Sall sites in the multiple cloning site of pcDNA3.1. This created a construct  
672 (pcDNA3.1\_TMDscreen) that expresses a protein that constitutively enters the endoplasmic  
673 reticulum. Sequences encoding candidate TMDs, plus 3 cytoplasmic amino acids and 7  
674 extracellular amino acids, were then ordered as paired oligonucleotides with 20 base pairs of  
675 overlap, and with overhangs that complemented the Sall and NotI sites in pcDNA3.1\_TMDscreen.  
676 Paired oligonucleotides were extended on one another with 3 rounds of 98°C (15 sec) → 55°C (20  
677 sec) → 72°C (30sec), followed by 72°C (7 min) in a thermal cycler. Double stranded oligos were  
678 then column purified and cloned into Sall-NotI digested pcDNA3.1\_TMDscreen by InFusion  
679 cloning, test digested and positive colonies were confirmed by Sanger sequencing (Source  
680 Bioscience). pcDNA3.1 vectors encoding 3xHA-mRHBDL1-4 and GFP-mRHBDL2 have been  
681 previously described elsewhere (Lohi et al., 2004; Adrain et al., 2011). Inactive S->A mutants, and  
682 AP-TMD4 Orai1 point mutant were generated using site directed mutagenesis kits, according to  
683 the manufacturers instructions (Agilent). Stim1-YFP and GFP-NFAT1 (1-460) were previously used  
684 and described in Kar et al., 2011. Orai1-myc was previously described in Yeh et al., 2019. To  
685 generate stable HaCaT cell lines inducibly expressing V5-Orai1 and Stim1-BirA we used pLVX  
686 plasmids (Takara) that were subcloned to express zeocin and blasticidin resistance genes, a kind  
687 gift from Dr Michael van der Weijer (Dunn School, Oxford). To generate pcDNA3.1-V5-Orai1 and  
688 pLVX-V5-Orai1, we PCR amplified human Orai1 either flanked by the regions surrounding the  
689 BamHI/XhoI sites in pcDNA3.1 or the AgeI site in pLVX\_Blasticidin. After digestion of pcDNA3.1  
690 and pLVX\_Blasticidin with corresponding restriction enzymes, we then inserted V5-Orai1 by  
691 InFusion cloning, according to manufacturers instructions (Takara). To generate pLVX-Stim1-BirA,  
692 we PCR amplified human Stim1 from Stim1-YFP, and BirA\* (Roux et al., 2012), with 20  
693 nucleotides of overlap with one another and the sequence flanking the AgeI site in pLVX\_Zeocin.  
694 After digestion of pLVX\_Zeocin with AgeI, we then inserted Stim1-BirA\* by InFusion cloning,  
695 according to the manufacturers instructions (Takara).

696

697 **Cell culture.** All cells used were maintained in regular high-glucose DMEM, supplemented with  
698 10% FCS, 100µg/ml penicillin, and 100µg/ml streptomycin. All cells used in this study were subject  
699 to regular mycoplasma testing.

700

701 **CRISPR-Cas9 gene editing.** For all editing, sequences of suitable guide RNAs were designed  
702 using publicly available prediction tools at [www.broadinstitute.org/rnai/public/analysis-tools/sgrna-](http://www.broadinstitute.org/rnai/public/analysis-tools/sgrna-design)  
703 [design](http://www.broadinstitute.org/rnai/public/analysis-tools/sgrna-design) (Doench et al., 2014) and at <http://crispr.mit.edu/> (Hsu et al., 2013). A paired nickase Cas9  
704 strategy was used to target the catalytic histidine in HEK cells to generate RHBDL2 KO HEKs.  
705 Guides targetting the following loci in human chromosome 1:  
706 TGAGCTGCAAAAGACACCTTGGG(-) and GGATTTGCTGGAATGTCCATTGG(+) were chosen.  
707 Guide sequences, without the PAM, were cloned into pSpCas9n(BB)-2A-Puro (px462), and  
708 sequence verified. Cells grown in 6 well dishes at 30-40% confluency were transfected with 500 ng  
709 CRISPR/Cas9. 24 h later cells were selected in 1µg/ml puromycin (Gibco) overnight. After 24 h  
710 recovery, 100 cells were seeded for colony growth in 10cm dishes. Colonies were picked used  
711 cloning discs and cells were amplified in 24 well dishes. Expanded colonies were then lysed at  
712 65°C in 10 mM Tris-HCl (pH 8), 25 mM NaCl, 1mM EDTA, and 200 µg/ml proteinase K. Proteinase  
713 K was inactivated at 95°C for 2 min and samples were analysed via PCR and high resolution melt  
714 analysis, according to (Bassett et al., 2013), and deletions were confirmed by Sanger sequencing  
715 (Source Bioscience, Oxford). Clone “5j” was found to contain a deletion around the catalytic  
716 histidine, which would also produce a premature stop codon. To target the endogenous RHBDL2  
717 gene in HaCaT cells using CRISPR/Cas9 we introduced a premature stop codon within exon 2 of  
718 the endogenous RHBDL2 gene by introducing indels targeting a site 115 bp after the initiator ATG  
719 codon of RHBDL2 (**Figure S2C**). Two of the four highest scoring guide RNA sequences (gRNA4:  
720 CCAAGAGTAAAAAGGTCCAC and gRNA1: ATGCTGCCCGAAAAGTCCCG) were cloned into  
721 pLenticrisprv2 (Sanjana et al., 2014) to yield targeting constructs pPR62 and pPR63, respectively.  
722 HaCaT cells were seeded at 5×10<sup>5</sup> cells per 6 cm dish. The next day cells were transfected with  
723 2 µg pPR62 or pPR63 using Fugene 6. 24 h later cells were selected using 2 µg/ml puromycin for  
724 96 hrs. Then media was exchanged for complete DMEM and cells were allowed to recover to  
725 confluence, at which point they were trypsinized, suspended in 1 ml PBS + 2% FBS and single cell  
726 sorted into 96 well plates containing 20% FBS, 50% conditioned medium, 30% complete medium  
727 and 1×Gentamycin/AmphotericinB (1 µg/ml and 250 ng/ml, respectively; Thermo R01510). Single  
728 cells were allowed to proliferate and were expanded for analysis by indel screening and western  
729 blotting. To screen for indels, genomic DNA from each clone was isolated, amplified by PCR using  
730 primers flanking the Cas9 cleavage site, and products were analysed by TBE agarose  
731 electrophoresis and comparison to untargeted HaCaT cells. Positive clones containing indels and  
732 lacking the wild type allele were further characterised by DNA sequencing and western blotting.  
733 For sequencing, primers flanking the Cas9 cleavage site were used to amplify this region by PCR  
734 from the genomic DNA of candidate KO clones before cloning into a vector, transformation and  
735 propagation in *E.coli*. A minimum of 7 colonies per clone were sequenced to identify all possible  
736 genomic alterations at the Cas9 cleavage site in the hypotetraploid HaCaT cells. Ultimately,  
737 absence of endogenous RHBDL2 protein and enzymatic activity was verified by western blotting  
738 using a polyclonal antibody against human RHBDL2 and an RHBDL2 substrate (**Figure S2D**). To  
739 serve as controls, untargeted wild type HaCaT cells were single-cell sorted and expanded into  
740 clonal cultures. Wild type clone B10 and RHBDL2 deficient clone H9 (generated with gRNA4) were  
741 used in all experiments in Figure 6C-F.

742  
743 **Lentivirus production and transduction.** HEK293 cells grown to 30-40% confluence in 6-well  
744 dishes were transfected with Lipofectamine 2000 (Invitrogen) in 35mm plates with 0.5 µg of pLKO  
745 shRNA or pLVX expression plasmids (Takara), 0.35 µg pCMV-dR8.2 and 0.15 µg pCMV-VSVG.  
746 The pLKO shRNA plasmids (Control shRNA against RhoGDI: CA143; RHBDL2 #1: CA146;  
747 RHBDL2 #2: CA148; RHBDL2 #3: CA149) were previously validated by (Adrain et al., 2011). The  
748 following day, medium was changed and transfected cells were allowed to secrete virus for 48-72  
749 hours in 2 ml complete medium. Culture supernatants were then centrifuged clarified by filtration  
750 with Sartorius Minisart syringe filters (0.45 µm pore size). For infection of HaCaTs or primary CD4-  
751 positive T cells, cells were split the day before, and viral supernatants were diluted 1- or 2-fold in  
752 fresh medium for transduction. Transduction was carried out in the presence of 10 µg/ml polybrene  
753 and a medium change was made 24 hours later. For selection, cells were treated with 10 µg/ml  
754 puromycin, 100 µg/ml zeocin or 5 µg/ml blasticidin, until all cells were killed in control  
755 transductions. In the case of the Stim1-BirA\* HaCaTs, WT and KO cells were first transduced with



756 pLVX-V5-Orai1-myc (and selected with blasticidin), followed by a second transduction with pLVX-  
757 Stim1-BirA\* (and selected with zeocin).

758  
759 **siRNA.** Orai1 siRNA was purchased from Horizon, ON-TARGET SMARTPool (Catalog ID: L-  
760 014998). A final concentration of 50 nM was used to knockdown Orai1. The following siRNAs  
761 against human rhomboid proteases were purchased from Invitrogen: RHBDL1 #1: HSS113329;  
762 RHBDL1 #2: HSS113330; RHBDL2 #1: HSS123556; RHBDL2 #2: HSS123558; RHBDL3 #1:  
763 HSS136312; RHBDL3 #2: HSS136314; RHBDL4/RHBDD1 #1: HSS130774; RHBDL4/RHBDD1 #2:  
764 HSS130775. Negative control medium GC duplex (cat no: 462001) was purchased from Invitrogen.  
765 For rhomboid knockdowns, including where two siRNAs were combined, a final concentration of 75  
766 nM was used. siRNAs were delivered using Lipofectamine RNAiMAX, according to the  
767 manufacturer's instructions (Invitrogen), and incubated for indicated time periods.

768  
769 **AP-TMD shedding assay.** To test rhomboid cleavage of candidate substrate transmembrane  
770 domains,  $5 \times 10^4$  HEK293 cells were plated in one well of a 96 well plate in the presence of 30 ng  
771 each of plasmids encoding AP-TMD and 3xHA-RHBDL constructs, pre-complexed in optiMEM  
772 (Gibco) with FuGene6 HD transfection reagent (Promega), according to manufacturers  
773 instructions. Cells were left for 24 hours to attach and express protein, and then exchanged into  
774 200  $\mu$ l optiMEM overnight. AP activity was detected in the supernatants or in cell lysates (using  
775 Triton-X100 buffer) by adding equal volumes of PNPP buffer (Thermo Scientific) followed by  
776 measurement of absorbance at 405 nm on a plate reader. The percentage of the total material  
777 shed from each well (i.e. signal from supernatant divided by total signal from lysate and  
778 supernatant) was then used to calculate release, and processed as described in the figure  
779 legends. Error bars represent standard error of the mean.

780  
781 **Cytosolic calcium readouts (including barium).** Cells were loaded with Fura 2 by incubating in  
782 1  $\mu$ M Fura 2-AM in external solution (145 mM NaCl, 2.8 mM KCl, 2 mM CaCl<sub>2</sub>, 2 mM MgCl<sub>2</sub>, 10  
783 mM Dglucose, 10 mM HEPES, pH 7.4) for 40 minutes in the dark, followed by washing and  
784 incubating in external solution for another 15 minutes for full de-esterification. Ca<sup>2+</sup>-free solution  
785 comprised of 145 mM NaCl, 2.8 mM KCl, 2 mM MgCl<sub>2</sub>, 10 mM D-glucose, 10 mM HEPES, 0.1 mM  
786 EGTA, was applied to cells prior to Ca<sup>2+</sup> image measurement, 1  $\mu$ M of Thapsigargin diluted to a  
787 final volume of 10  $\mu$ l by Ca<sup>2+</sup>-free solution was applied in around 1 min after the recording started.  
788 While the trace go to the basal levels in around 10 min after Thapsigargin treatment, 2mM Ca<sup>2+</sup> or  
789 Ba<sup>2+</sup> were then applied. Cells were alternately excited at 356 and 380 nm, and signals were  
790 acquired every 2 sec. Calcium signals are represented by the 356 nm/380 nm ratio (R). All the  
791 images were analyzed by using IGOR Pro software.

792  
793 **T cell isolation and activation assay.** T cells were isolated as previously described (Breuning  
794 and Brown, 2017). In brief, using RosetteSep™, primary CD4<sup>+</sup> T cells were isolated from cones  
795 from anonymous donors with approval from the National Health Service Blood and Transplant  
796 (NHSBT) and stimulated with CD3 and CD28 mAbs on Dynabeads (Thermo Fisher) in the  
797 presence of 100 U/ml IL-2 to produce T cell blasts. Primary T cell blasts were transduced with  
798 pLKO-based shRNA expressing lentivirus and selected for puromycin resistance for at least one  
799 week. Depletion of RHBDL2 mRNA was then confirmed by RT-pPCR. For functional assays, 96-  
800 well round-bottom plates were coated with varying doses of CD3 mAb (UCHT1; eBioscience).  
801 Transduced activated primary CD4<sup>+</sup> T cells ( $5 \times 10^5$  cells in 200  $\mu$ l) were added, and the mixture  
802 was incubated for 18 h at 37°C. Cells were then stained with anti-CD69-allophycocyanin (APC)  
803 (Life Technologies) and analysed for percentage positivity by flow cytometry using a FACSCalibur  
804 plate reader (BDBiosciences). Dose-response curves and EC50 values were generated with  
805 GraphPad Prism.

806  
807 **qRT-PCR:** Total RNA was isolated from HaCaT cells by using RNeasy micro kit (Qiagen)  
808 according to the manufacturers instructions. 2000 ng RNA was used for cDNA synthesis using a  
809 cDNA Synthesis kit (PCR Biosystems) according to the manufacturers instructions. In most cases,  
810 the cDNA was then diluted 5-fold in water, except from cDNA from primary T cells, which was  
811 undiluted. qPCR was performed using TaqMan gene expression assays (Applied Biosystems)

812 against the stated target genes in a StepOnePlus system (Applied Biosystems). GAPDH was used  
813 as a housekeeping gene for normalisation. The Applied Biosystems TaqMan probes, all purchased  
814 through Life Technologies, were as follows: RHBDL2 (Hs00983274\_m1), TNF alpha  
815 (Hs00174128\_m1), IL-6 (Hs00985639\_m1) and GAPDH (Hs02786624\_g1).

816  
817 **SDS-PAGE and western blotting.** Samples were typically electrophoresed at 150V on 4-12% Bis-  
818 Tris gels (Invitrogen) until the dye front had migrated off the gel (approx. 10-15 kDa). Gels were  
819 transferred onto PVDF membranes and blocked in PBS or TBS containing Tween 20 (0.05%) and  
820 5% milk or 1% BSA, before detection with the indicated primary antibodies and species-specific  
821 HRP-coupled secondary antibodies. Band visualisation was achieved with Enhanced  
822 Chemiluminescence (Amersham Biosciences) using X-ray film. To aid quantification of Orai1  
823 protein, all Orai1 lysate preparations were treated with PNGase (NEB) to remove all glycosylation,  
824 according to the manufacturers instruction.

825  
826 **Stim1-BirA\* biotin capture assay.** WT and R2 KO HaCaT cells expressing pLVX-based V5-  
827 Orai1-myc and Stim1-BirA\* were plated at  $1 \times 10^6$  in the presence of 50  $\mu$ M biotin and 100 ng/ml  
828 doxycycline (to induce their expression) for 96 hours. Prior to lysis, where stated, cells were then  
829 treated with 100 nM bafilomycin A1. Cells then underwent 3x PBS washes to remove excess  
830 biotin. Cells were then lysed in RIPA buffer (50mM Tris pH 7.4, 150 mM NaCl, 1% NP40, 0.5%  
831 Sodium Deoxycholate, pH 7.4) containing complete protease inhibitor cocktail (Roche). Lysates  
832 were pulse-sonicated in an ice-water bath for 5 mins. After pelleting at 10,000 x g, clarified  
833 supernatants were incubated with 30 $\mu$ l high-capacity neutravidin agarose beads overnight to  
834 capture biotinylated proteins (Thermo Scientific, catalogue number 29204). Beads were then  
835 washed 3x with ice-cold RIPA buffer and eluted with 2x SDS sample buffer with excess biotin at  
836 95°C for 15 mins. In all cases, 50% of the bead eluate and 1% lysate was loaded onto SDS-PAGE  
837 gels.

838  
839 **Immunoprecipitation.** HEK293 cells transfected for 24 hours with different versions of V5-Orai1-  
840 myc and 3xHA-RHBDL2-SA were grown to ~90% confluence in 10 cm plates, on the day of IP.  
841 Cells were washed 3x with PBS and then lysed in 1 ml TX-100 lysis buffer (1% Triton X-100,  
842 150mM NaCl, 50 mM Tris-HCl, pH 7.4) supplemented with protease inhibitor cocktail (Roche). Cell  
843 lysates were cleared by centrifugation at 10,000 x g for 10 mins at 4°C. Protein concentrations  
844 were measured by a BCA assay kit (Pierce). The lysates were then immunoprecipitated for 2-3  
845 hours with 20  $\mu$ l pre-washed HA antibody-coupled beads at 4°C on a rotor. After 4-5 washes with  
846 lysis buffer, the immunocomplexes were incubated at 65°C for 15 mins in 2x SDS sample buffer.  
847 Typically, 50% of the immunoprecipitates and 1% of lysates were resolved on SDS-PAGE gels for  
848 subsequent western blotting.

849  
850 **Light microscopy.** HEK293 cells transfected with indicated constructs were plated on 13mm  
851 glass coverslips in 6 well dishes. Cells were washed 1x in room temperature PBS and fixed with  
852 4% paraformaldehyde in PBS at room temperature for 20-30 mins. Fixative was quenched with  
853 50mM NH<sub>4</sub>Cl for 5 mins. Cells were permeabilised in 0.2% TX-100 in PBS for 30 mins and  
854 epitopes blocked with 1% fish-skin gelatin (Sigma) in PBS for 1 hour. Coverslips were then  
855 incubated overnight with indicated antibodies in 1% fish-skin gelatin/PBS. After 3x PBS washes,  
856 coverslips were incubated with corresponding species-specific fluorescently coupled secondary  
857 antibodies (Invitrogen) for 45mins. Cells were subsequently washed 3x with PBS and 1x with H<sub>2</sub>O,  
858 prior to mounting on glass slides with mounting medium containing DAPI (ProLong Gold;  
859 ThermoFisher Scientific). For GFP-NFAT experiments, the fluorescent GFP signal was acquired.  
860 Images were acquired with a laser scanning confocal microscope (Fluoview FV1000; Olympus)  
861 with a 60x1.4 NA oil objective, and processed using Fiji (Image J).

862  
863 **Bioinformatics.** For searches based on TMD helical instability, we used HHpred in the MPI  
864 Bioinformatics Toolkit (<https://toolkit.tuebingen.mpg.de/tools/hhpred>). We queried the mouse  
865 proteome using Drosophila melanogaster Spitz, using the sequence surrounding and including the  
866 transmembrane domain region (PRPMLEKASIASGAMCALVFMLFVCLAFYLRFE). Most of the top  
867 hits that had an aligned transmembrane domain in the .hhr file (available upon request) were

868 picked for the TMD screen with mouse RHBDL2. For searches of EGF domain-containing TMD  
869 proteins, we used Uniprot (<https://www.uniprot.org>), selecting for the presence of both  
870 transmembrane helices in a Type-I orientation and presence of an extracellular EGF-like domain.  
871 TMD regions of the hits were uniformly determined using manual searches in TMHMM Server  
872 v.2.0 (<http://www.cbs.dtu.dk/services/TMHMM/>) and we included three amino acids on the  
873 cytoplasmic side, and seven amino acids on the extracellular/luminal side, according to Uniprot  
874 amino acid sequence entries (<https://www.uniprot.org>). RHBDL2 expression data was taken from  
875 the GTEx Portal. The Genotype-Tissue Expression (GTEx) Project was supported by the Common  
876 Fund of the Office of the Director of the National Institutes of Health, and by NCI, NHGRI, NHLBI,  
877 NIDA, NIMH, and NINDS. The data used for the analyses described in this manuscript were  
878 obtained from: the GTEx Portal on 01/07/20.

879  
880  
881

## 882 **References**

883

- 884 Adrain, C., Strisovsky, K., Zettl, M., Hu, L., Lemberg, M. K., and Freeman, M. (2011). Mammalian  
885 EGF receptor activation by the rhomboid protease RHBDL2. *EMBO Rep* 12, 421-427.
- 886 Baker, R. P., and Urban, S. (2015). Cytosolic extensions directly regulate a rhomboid protease by  
887 modulating substrate gating. *Nature* 523, 101-105.
- 888 Bakowski, D., and Parekh, A. B. (2007). Voltage-dependent Ba<sup>2+</sup> permeation through store-  
889 operated CRAC channels: implications for channel selectivity. *Cell Calcium* 42, 333-339.
- 890 Bassett, A. R., Tibbit, C., Ponting, C. P., and Liu, J. L. (2013). Highly efficient targeted  
891 mutagenesis of *Drosophila* with the CRISPR/Cas9 system. *Cell Rep* 4, 220-228.
- 892 Began, J., Cordier, B., Březinová, J., Delisle, J., Hexnerová, R., Srb, P., Rampírová, P., Kožíšek,  
893 M., Baudet, M., Couté, Y., Galinier, A., Veverka, V., Doan, T., and Strisovsky, K. (2020).  
894 Rhomboid intramembrane protease YqgP licenses bacterial membrane protein quality  
895 control as adaptor of FtsH AAA protease. *EMBO J* e102935.
- 896 Berridge, M. J., Lipp, P., and Bootman, M. D. (2000). The versatility and universality of calcium  
897 signalling. *Nat Rev Mol Cell Biol* 1, 11-21.
- 898 Brandman, O., Liou, J., Park, W. S., and Meyer, T. (2007). STIM2 is a feedback regulator that  
899 stabilizes basal cytosolic and endoplasmic reticulum Ca<sup>2+</sup> levels. *Cell* 131, 1327-1339.
- 900 Breuning, J., and Brown, M. H. (2017). T Cell Costimulation by CD6 Is Dependent on Bivalent  
901 Binding of a GADS/SLP-76 Complex. *Mol Cell Biol* 37,
- 902 Burdakov, D., and Verkhatsky, A. (2006). Biophysical re-equilibration of Ca<sup>2+</sup> fluxes as a simple  
903 biologically plausible explanation for complex intracellular Ca<sup>2+</sup> release patterns. *FEBS Lett*  
904 580, 463-468.
- 905 Cai, X., Zhou, Y., Nwokonko, R. M., Loktionova, N. A., Wang, X., Xin, P., Trebak, M., Wang, Y.,  
906 and Gill, D. L. (2016). The Orai1 Store-operated Calcium Channel Functions as a Hexamer.  
907 *J Biol Chem* 291, 25764-25775.
- 908 Doench, J. G., Hartenian, E., Graham, D. B., Tothova, Z., Hegde, M., Smith, I., Sullender, M.,  
909 Ebert, B. L., Xavier, R. J., and Root, D. E. (2014). Rational design of highly active sgRNAs  
910 for CRISPR-Cas9-mediated gene inactivation. *Nat Biotechnol* 32, 1262-1267.
- 911 Feske, S. (2007). Calcium signalling in lymphocyte activation and disease. *Nat Rev Immunol* 7,  
912 690-702.
- 913 Feske, S. (2010). CRAC channelopathies. *Pflugers Arch* 460, 417-435.
- 914 Feske, S., Gwack, Y., Prakriya, M., Srikanth, S., Puppel, S. H., Tanasa, B., Hogan, P. G., Lewis,  
915 R. S., Daly, M., and Rao, A. (2006). A mutation in Orai1 causes immune deficiency by  
916 abrogating CRAC channel function. *Nature* 441, 179-185.
- 917 Fleig, L., Bergbold, N., Sahasrabudhe, P., Geiger, B., Kaltak, L., and Lemberg, M. K. (2012).  
918 Ubiquitin-dependent intramembrane rhomboid protease promotes ERAD of membrane  
919 proteins. *Mol Cell* 47, 558-569.
- 920 Freeman, M. (2014). The rhomboid-like superfamily: molecular mechanisms and biological roles.  
921 *Annu Rev Cell Dev Biol* 30, 235-254.



- 922 Fukushima, M., Tomita, T., Janoshazi, A., and Putney, J. W. (2012). Alternative translation  
923 initiation gives rise to two isoforms of Orai1 with distinct plasma membrane mobilities. *J Cell*  
924 *Sci* 125, 4354-4361.
- 925 Hogan, P. G., Lewis, R. S., and Rao, A. (2010). Molecular basis of calcium signaling in  
926 lymphocytes: STIM and ORAI. *Annu Rev Immunol* 28, 491-533.
- 927 Hogan, P. G., and Rao, A. (2015). Store-operated calcium entry: Mechanisms and modulation.  
928 *Biochem Biophys Res Commun* 460, 40-49.
- 929 Hoover, P. J., and Lewis, R. S. (2011). Stoichiometric requirements for trapping and gating of  
930 Ca<sup>2+</sup> release-activated Ca<sup>2+</sup> (CRAC) channels by stromal interaction molecule 1 (STIM1).  
931 *Proc Natl Acad Sci U S A* 108, 13299-13304.
- 932 Hoth, M. (1995). Calcium and barium permeation through calcium release-activated calcium  
933 (CRAC) channels. *Pflugers Arch* 430, 315-322.
- 934 Hou, X., Burstein, S. R., and Long, S. B. (2018). Structures reveal opening of the store-operated  
935 calcium channel Orai. *Elife* 7,
- 936 Hou, X., Pedi, L., Diver, M. M., and Long, S. B. (2012). Crystal structure of the calcium release-  
937 activated calcium channel Orai. *Science* 338, 1308-1313.
- 938 Hsu, P. D., Scott, D. A., Weinstein, J. A., Ran, F. A., Konermann, S., Agarwala, V., Li, Y., Fine, E.  
939 J., Wu, X., Shalem, O., Cradick, T. J., Marraffini, L. A., Bao, G., and Zhang, F. (2013). DNA  
940 targeting specificity of RNA-guided Cas9 nucleases. *Nat Biotechnol* 31, 827-832.
- 941 Ji, W., Xu, P., Li, Z., Lu, J., Liu, L., Zhan, Y., Chen, Y., Hille, B., Xu, T., and Chen, L. (2008).  
942 Functional stoichiometry of the unitary calcium-release-activated calcium channel. *Proc Natl*  
943 *Acad Sci U S A* 105, 13668-13673.
- 944 Johnson, N., Březinová, J., Stephens, E., Burbridge, E., Freeman, M., Adrain, C., and Strisovsky,  
945 K. (2017). Quantitative proteomics screen identifies a substrate repertoire of rhomboid  
946 protease RHBDL2 in human cells and implicates it in epithelial homeostasis. *Sci Rep* 7,  
947 7283.
- 948 Kar, P., Nelson, C., and Parekh, A. B. (2011). Selective activation of the transcription factor NFAT1  
949 by calcium microdomains near Ca<sup>2+</sup> release-activated Ca<sup>2+</sup> (CRAC) channels. *J Biol Chem*  
950 286, 14795-14803.
- 951 Kar, P., and Parekh, A. (2013). STIM proteins, Orai1 and gene expression. *Channels (Austin)* 7,  
952 374-378.
- 953 Kreutzberger, A. J. B., Ji, M., Aaron, J., Mihaljević, L., and Urban, S. (2019). Rhomboid distorts  
954 lipids to break the viscosity-imposed speed limit of membrane diffusion. *Science* 363,
- 955 Lastun, V. L., Grieve, A. G., and Freeman, M. (2016). Substrates and physiological functions of  
956 secretase rhomboid proteases. *Semin Cell Dev Biol* 60, 10-18.
- 957 Lemberg, M. K., and Freeman, M. (2007). Functional and evolutionary implications of enhanced  
958 genomic analysis of rhomboid intramembrane proteases. *Genome Res* 17, 1634-1646.
- 959 Lemberg, M. K., and Martoglio, B. (2002). Requirements for signal peptide peptidase-catalyzed  
960 intramembrane proteolysis. *Mol Cell* 10, 735-744.
- 961 Liou, J., Fivaz, M., Inoue, T., and Meyer, T. (2007). Live-cell imaging reveals sequential  
962 oligomerization and local plasma membrane targeting of stromal interaction molecule 1 after  
963 Ca<sup>2+</sup> store depletion. *Proc Natl Acad Sci U S A* 104, 9301-9306.
- 964 Lohi, O., Urban, S., and Freeman, M. (2004). Diverse substrate recognition mechanisms for  
965 rhomboids; thrombomodulin is cleaved by Mammalian rhomboids. *Curr Biol* 14, 236-241.
- 966 Mercer, J. C., Dehaven, W. I., Smyth, J. T., Wedel, B., Boyles, R. R., Bird, G. S., and Putney, J. W.  
967 (2006). Large store-operated calcium selective currents due to co-expression of Orai1 or  
968 Orai2 with the intracellular calcium sensor, Stim1. *J Biol Chem* 281, 24979-24990.
- 969 Moin, S. M., and Urban, S. (2012). Membrane immersion allows rhomboid proteases to achieve  
970 specificity by reading transmembrane segment dynamics. *Elife* 1, e00173.
- 971 Nesin, V., Wiley, G., Kousi, M., Ong, E. C., Lehmann, T., Nicholl, D. J., Suri, M., Shahrizaila, N.,  
972 Katsanis, N., Gaffney, P. M., Wierenga, K. J., and Tsiokas, L. (2014). Activating mutations in  
973 STIM1 and ORAI1 cause overlapping syndromes of tubular myopathy and congenital miosis.  
974 *Proc Natl Acad Sci U S A* 111, 4197-4202.
- 975 Orci, L., Ravazzola, M., Le Coadic, M., Shen, W. W., Demaurex, N., and Cosson, P. (2009). From  
976 the Cover: STIM1-induced precortical and cortical subdomains of the endoplasmic reticulum.  
977 *Proc Natl Acad Sci U S A* 106, 19358-19362.

- 978 Palty, R., Stanley, C., and Isacoff, E. Y. (2015). Critical role for Orai1 C-terminal domain and TM4  
979 in CRAC channel gating. *Cell Res* 25, 963-980.
- 980 Parekh, A. B., and Putney, J. W. (2005). Store-operated calcium channels. *Physiol Rev* 85, 757-  
981 810.
- 982 Park, C. Y., Hoover, P. J., Mullins, F. M., Bachhawat, P., Covington, E. D., Raunser, S., Walz, T.,  
983 Garcia, K. C., Dolmetsch, R. E., and Lewis, R. S. (2009). STIM1 clusters and activates  
984 CRAC channels via direct binding of a cytosolic domain to Orai1. *Cell* 136, 876-890.
- 985 Peinelt, C., Vig, M., Koomoa, D. L., Beck, A., Nadler, M. J., Koblan-Huberson, M., Lis, A., Fleig, A.,  
986 Penner, R., and Kinet, J. P. (2006). Amplification of CRAC current by STIM1 and CRACM1  
987 (Orai1). *Nat Cell Biol* 8, 771-773.
- 988 Prakriya, M., Feske, S., Gwack, Y., Srikanth, S., Rao, A., and Hogan, P. G. (2006). Orai1 is an  
989 essential pore subunit of the CRAC channel. *Nature* 443, 230-233.
- 990 Prakriya, M., and Lewis, R. S. (2015). Store-Operated Calcium Channels. *Physiol Rev* 95, 1383-  
991 1436.
- 992 Rao, A., Luo, C., and Hogan, P. G. (1997). Transcription factors of the NFAT family: regulation and  
993 function. *Annu Rev Immunol* 15, 707-747.
- 994 Roux, K. J., Kim, D. I., Raida, M., and Burke, B. (2012). A promiscuous biotin ligase fusion protein  
995 identifies proximal and interacting proteins in mammalian cells. *J Cell Biol* 196, 801-810.
- 996 Sahin, U., Weskamp, G., Kelly, K., Zhou, H. M., Higashiyama, S., Peschon, J., Hartmann, D.,  
997 Saftig, P., and Blobel, C. P. (2004). Distinct roles for ADAM10 and ADAM17 in ectodomain  
998 shedding of six EGFR ligands. *J Cell Biol* 164, 769-779.
- 999 Sanjana, N. E., Shalem, O., and Zhang, F. (2014). Improved vectors and genome-wide libraries for  
1000 CRISPR screening. *Nat Methods* 11, 783-784.
- 1001 Scrimgeour, N., Litjens, T., Ma, L., Barritt, G. J., and Rychkov, G. Y. (2009). Properties of Orai1  
1002 mediated store-operated current depend on the expression levels of STIM1 and Orai1  
1003 proteins. *J Physiol* 587, 2903-2918.
- 1004 Soboloff, J., Spassova, M. A., Tang, X. D., Hewavitharana, T., Xu, W., and Gill, D. L. (2006). Orai1  
1005 and STIM1 reconstitute store-operated calcium channel function. *J Biol Chem* 281, 20661-  
1006 20665.
- 1007 Strisovsky, K., Sharpe, H. J., and Freeman, M. (2009). Sequence-specific intramembrane  
1008 proteolysis: identification of a recognition motif in rhomboid substrates. *Mol Cell* 36, 1048-  
1009 1059.
- 1010 Subedi, K. P., Ong, H. L., Son, G. Y., Liu, X., and Ambudkar, I. S. (2018). STIM2 Induces Activated  
1011 Conformation of STIM1 to Control Orai1 Function in ER-PM Junctions. *Cell Rep* 23, 522-534.
- 1012 Urban, S., and Freeman, M. (2003). Substrate specificity of rhomboid intramembrane proteases is  
1013 governed by helix-breaking residues in the substrate transmembrane domain. *Mol Cell* 11,  
1014 1425-1434.
- 1015 Vig, M., Peinelt, C., Beck, A., Koomoa, D. L., Rabah, D., Koblan-Huberson, M., Kraft, S., Turner,  
1016 H., Fleig, A., Penner, R., and Kinet, J. P. (2006). CRACM1 is a plasma membrane protein  
1017 essential for store-operated Ca<sup>2+</sup> entry. *Science* 312, 1220-1223.
- 1018 Wu, M. M., Buchanan, J., Luik, R. M., and Lewis, R. S. (2006). Ca<sup>2+</sup> store depletion causes STIM1  
1019 to accumulate in ER regions closely associated with the plasma membrane. *J Cell Biol* 174,  
1020 803-813.
- 1021 Yamashita, M., Yeung, P. S., Ing, C. E., McNally, B. A., Pomès, R., and Prakriya, M. (2017).  
1022 STIM1 activates CRAC channels through rotation of the pore helix to open a hydrophobic  
1023 gate. *Nat Commun* 8, 14512.
- 1024 Ye, J., Davé, U. P., Grishin, N. V., Goldstein, J. L., and Brown, M. S. (2000). Asparagine-proline  
1025 sequence within membrane-spanning segment of SREBP triggers intramembrane cleavage  
1026 by site-2 protease. *Proc Natl Acad Sci U S A* 97, 5123-5128.
- 1027 Yeh, Y. C., Lin, Y. P., Kramer, H., and Parekh, A. B. (2019). Single nucleotide polymorphisms in  
1028 Orai1 associated with atopic dermatitis inhibit protein turnover, decrease calcium entry and  
1029 disrupt calcium-dependent gene expression. *Hum Mol Genet*
- 1030 Yeung, P. S., Yamashita, M., Ing, C. E., Pomès, R., Freymann, D. M., and Prakriya, M. (2018).  
1031 Mapping the functional anatomy of Orai1 transmembrane domains for CRAC channel gating.  
1032 *Proc Natl Acad Sci U S A* 115, E5193-E5202.

- 1033 Yeung, P. S., Yamashita, M., and Prakriya, M. (2019). Molecular basis of allosteric Orai1 channel  
1034 activation by STIM1. *J Physiol*
- 1035 Zhang, S. L., Yeromin, A. V., Zhang, X. H., Yu, Y., Safrina, O., Penna, A., Roos, J., Stauderman,  
1036 K. A., and Cahalan, M. D. (2006). Genome-wide RNAi screen of Ca(2+) influx identifies  
1037 genes that regulate Ca(2+) release-activated Ca(2+) channel activity. *Proc Natl Acad Sci U S*  
1038 *A* *103*, 9357-9362.
- 1039 Ziegler, S. F., Ramsdell, F., and Alderson, M. R. (1994). The activation antigen CD69. *Stem Cells*  
1040 *12*, 456-465.
- 1041 Zimmermann, L., Stephens, A., Nam, S. Z., Rau, D., Kübler, J., Lozajic, M., Gabler, F., Söding, J.,  
1042 Lupas, A. N., and Alva, V. (2018). A Completely Reimplemented MPI Bioinformatics Toolkit  
1043 with a New HHpred Server at its Core. *J Mol Biol* *430*, 2237-2243.
- 1044

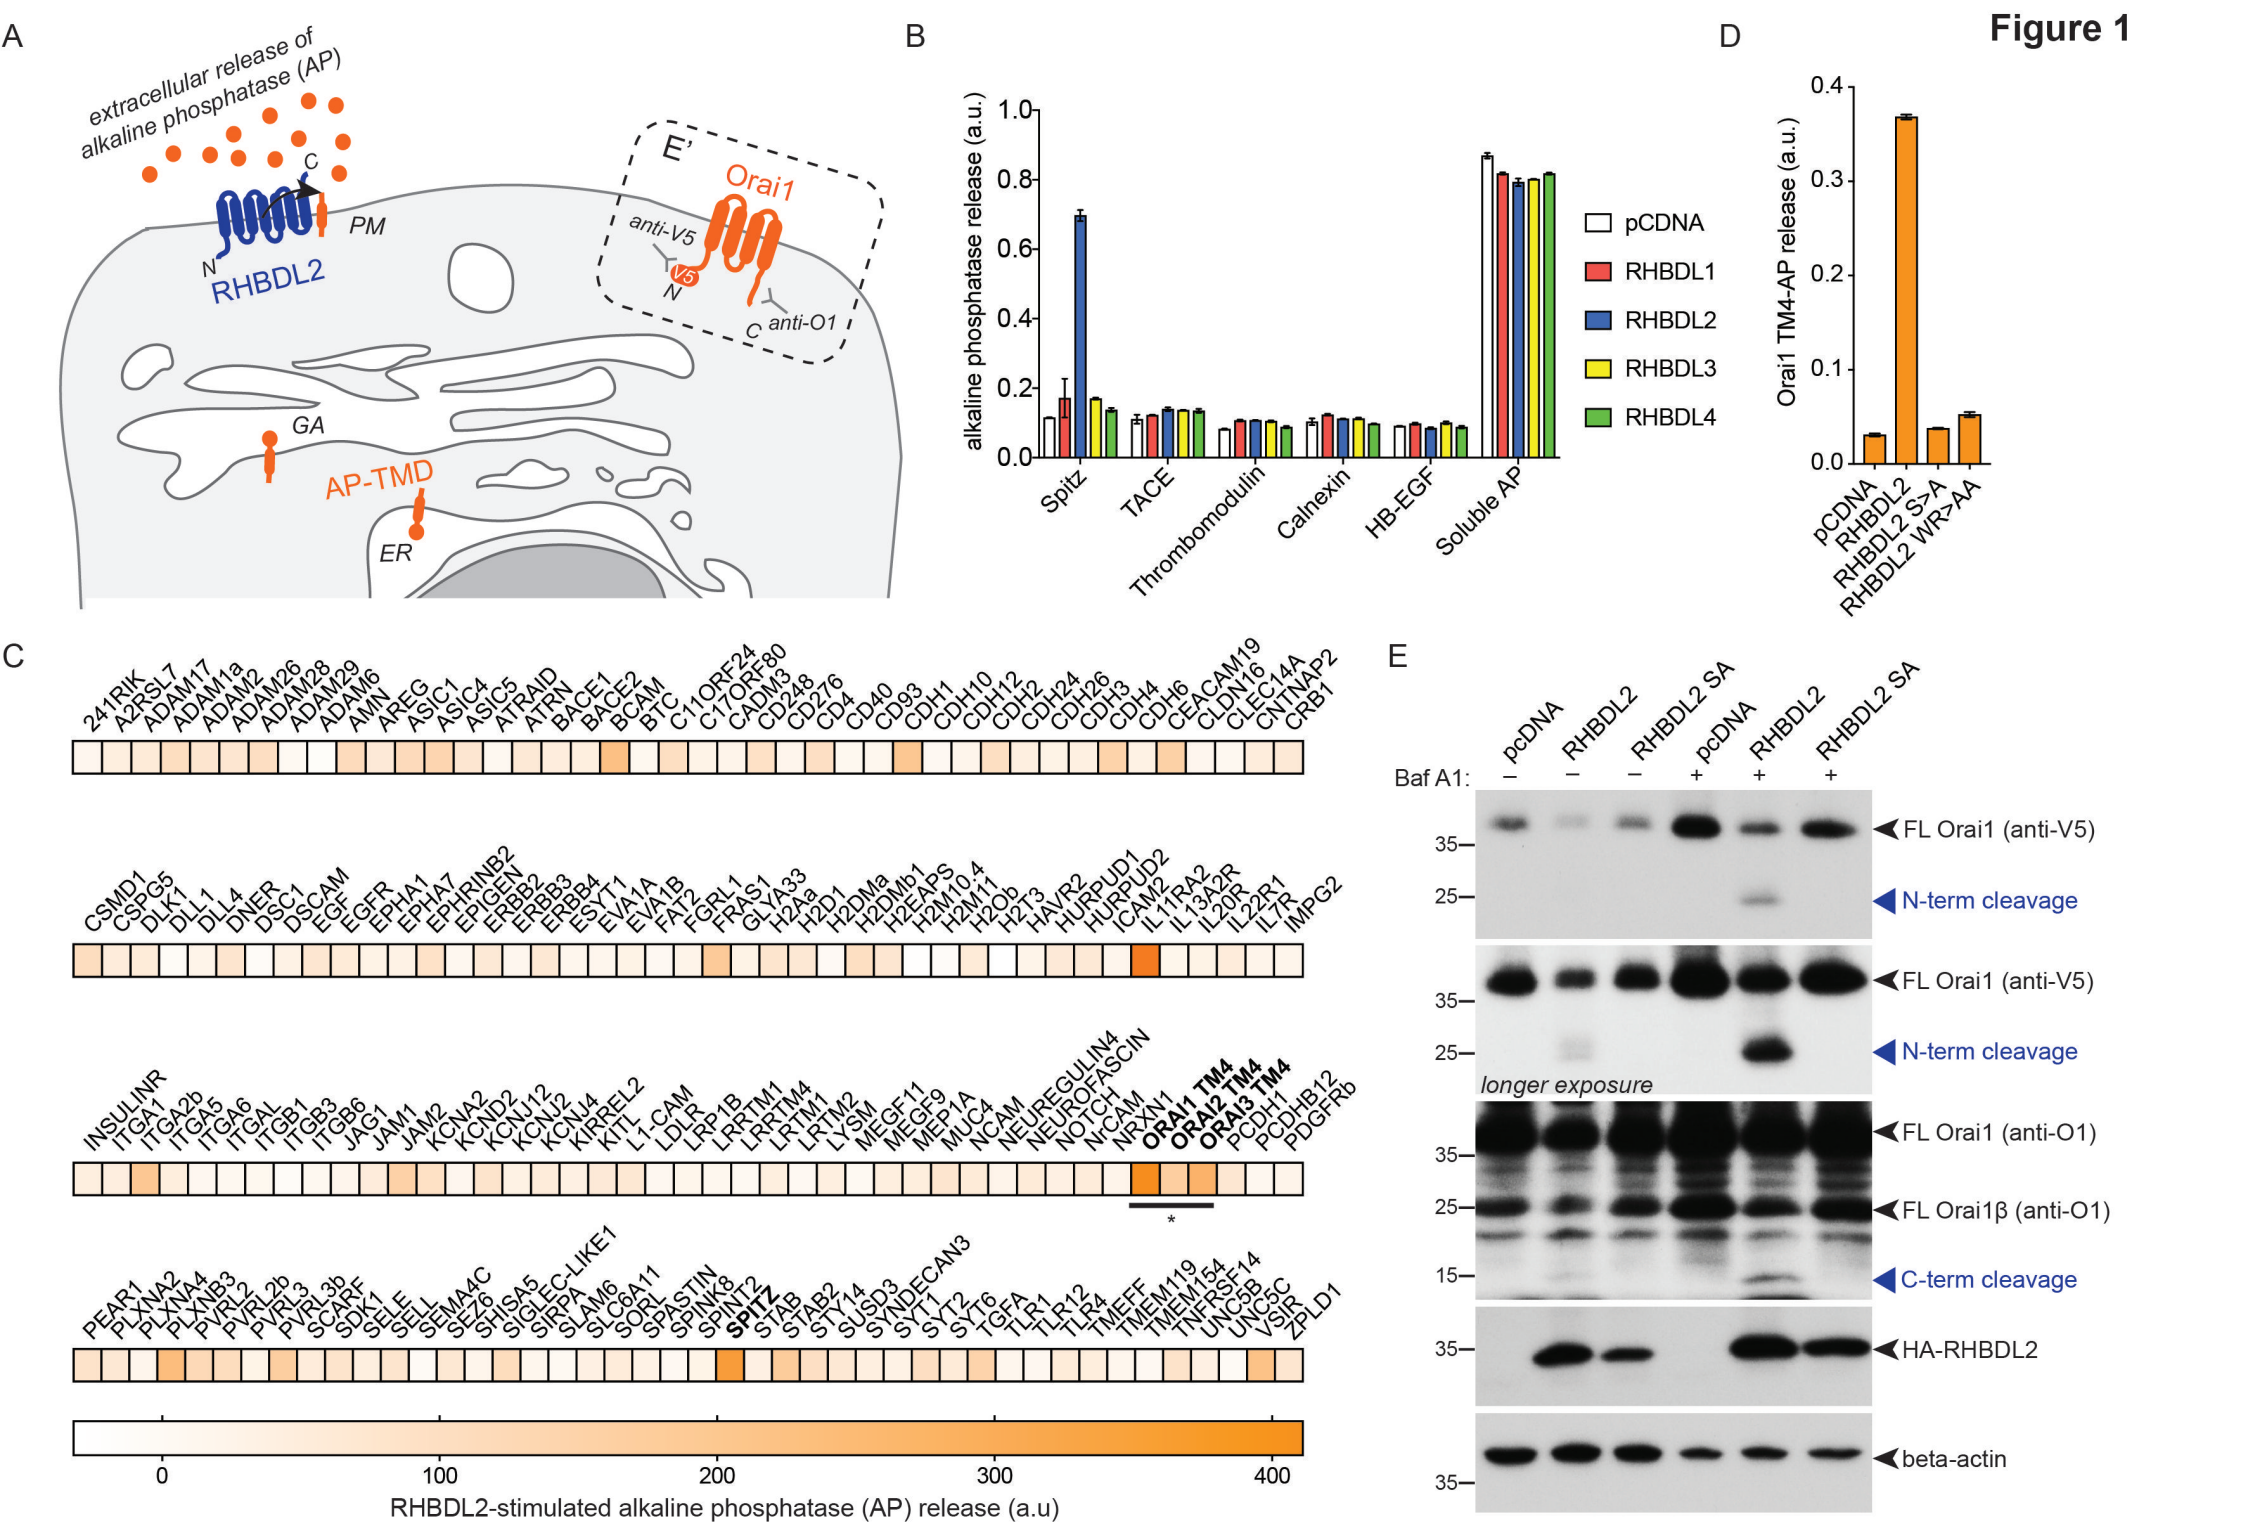



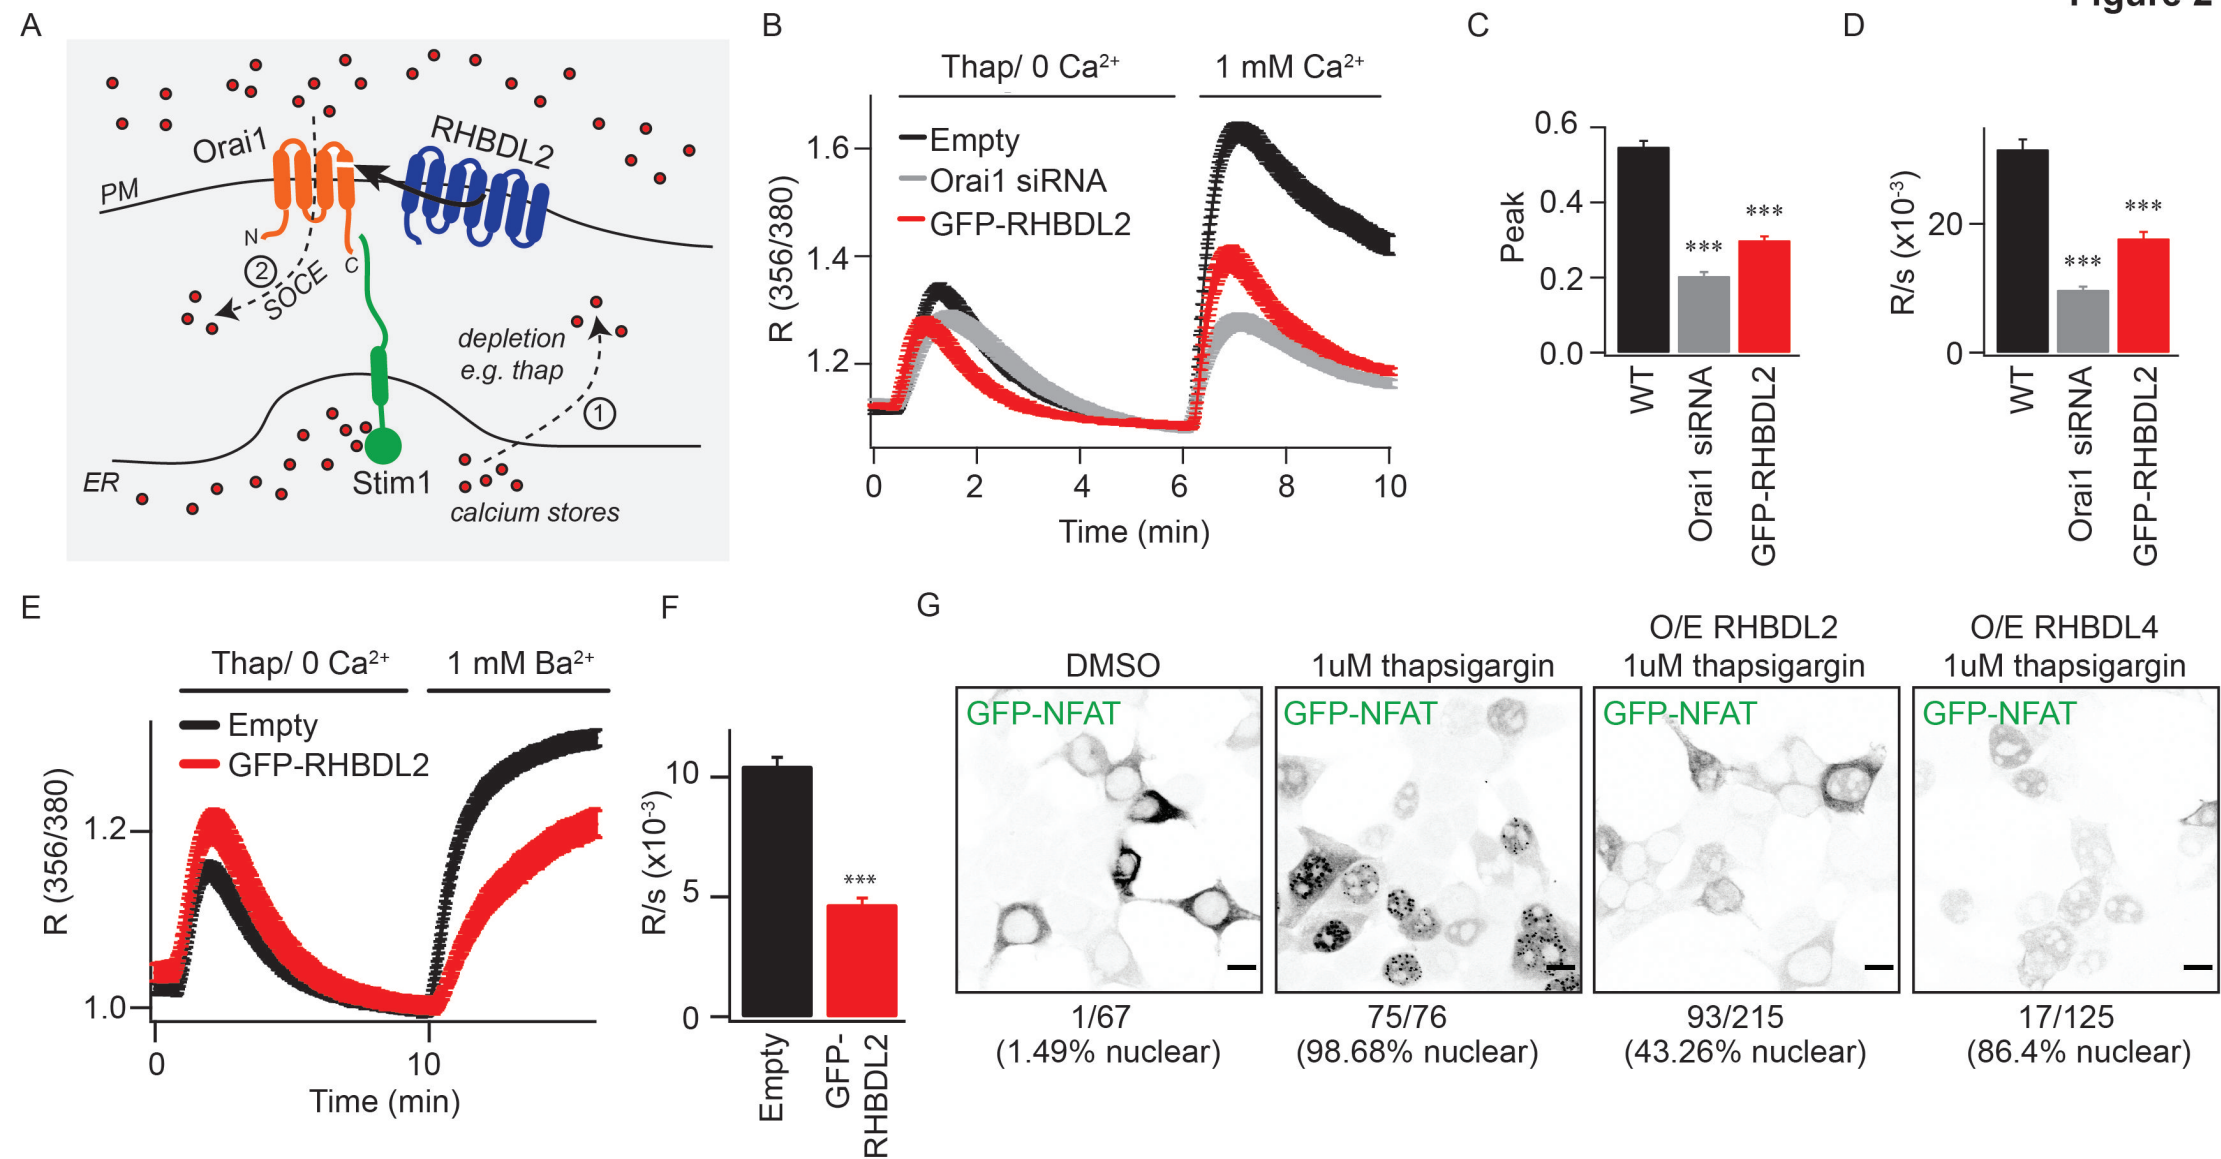



**A**

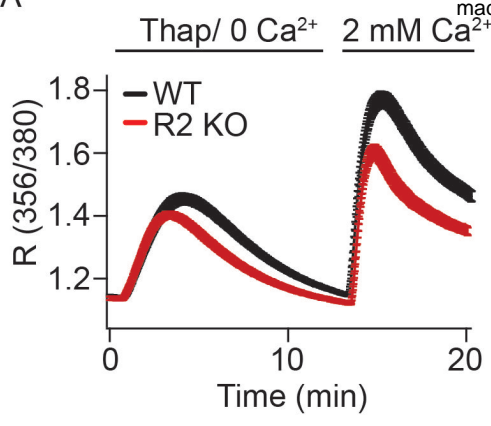

**B**

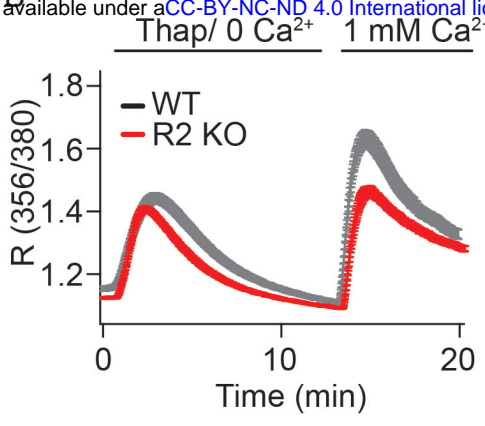

**C**

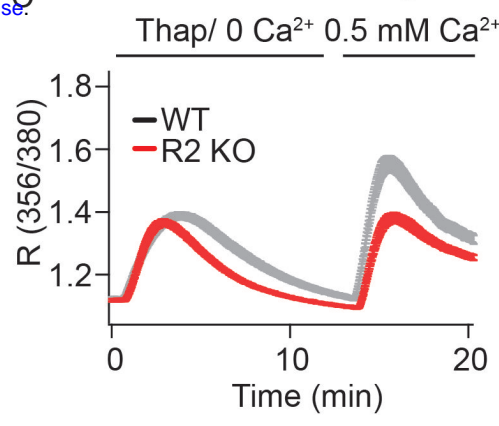

**D**

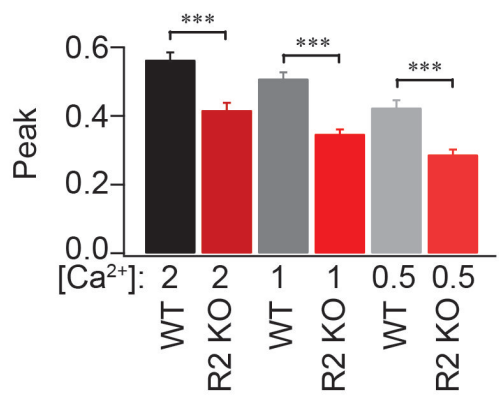

**E**

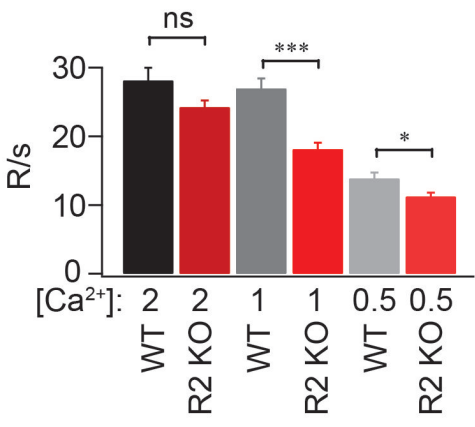

**F**

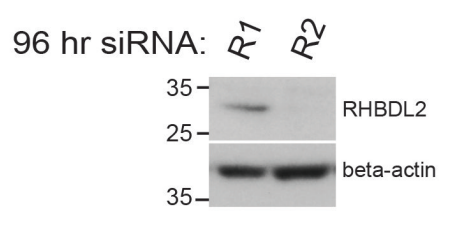

**G**

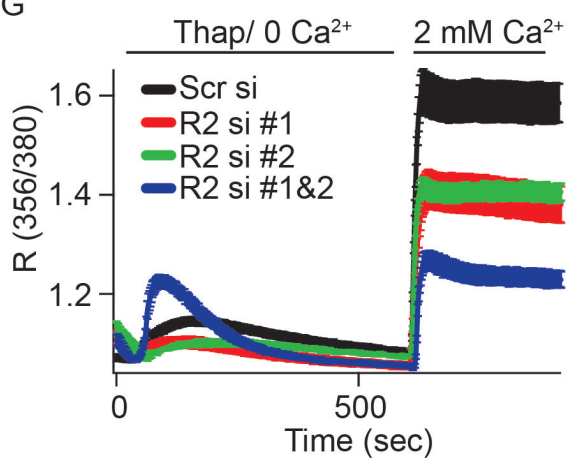

**H**

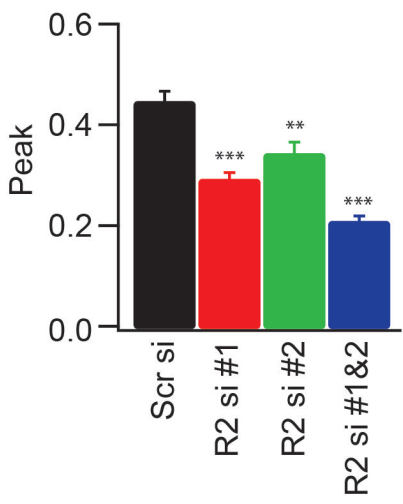

**I**

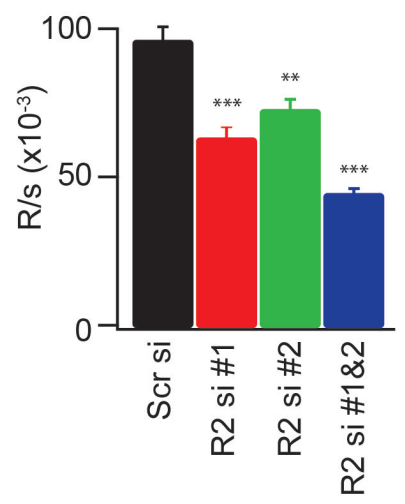

Figure 4

A

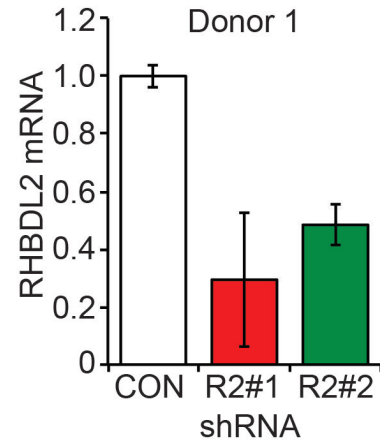

B

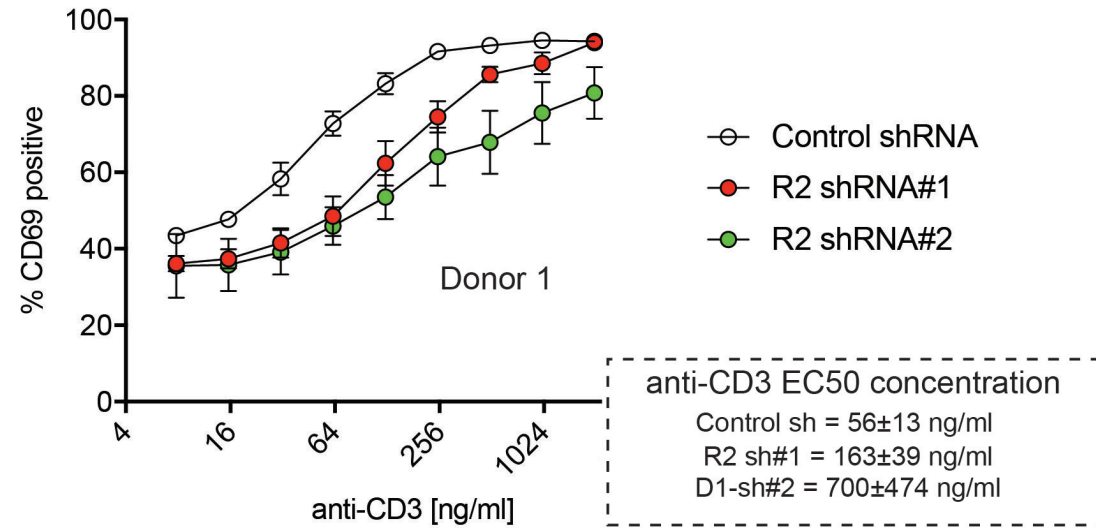

C

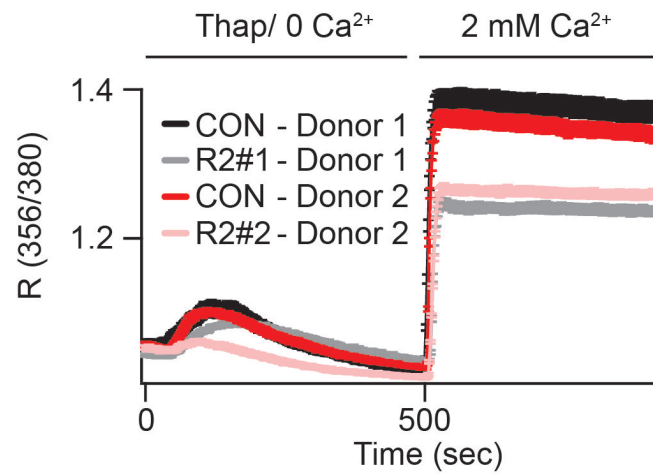

D

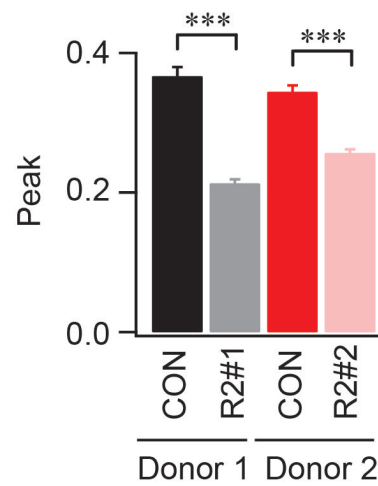

E

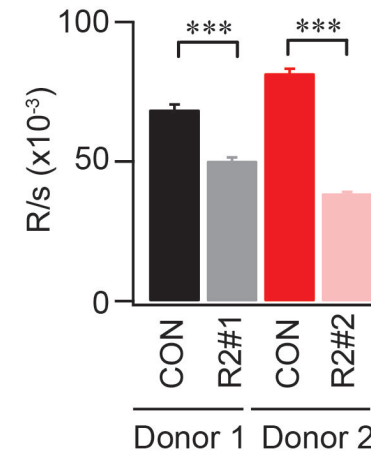

A

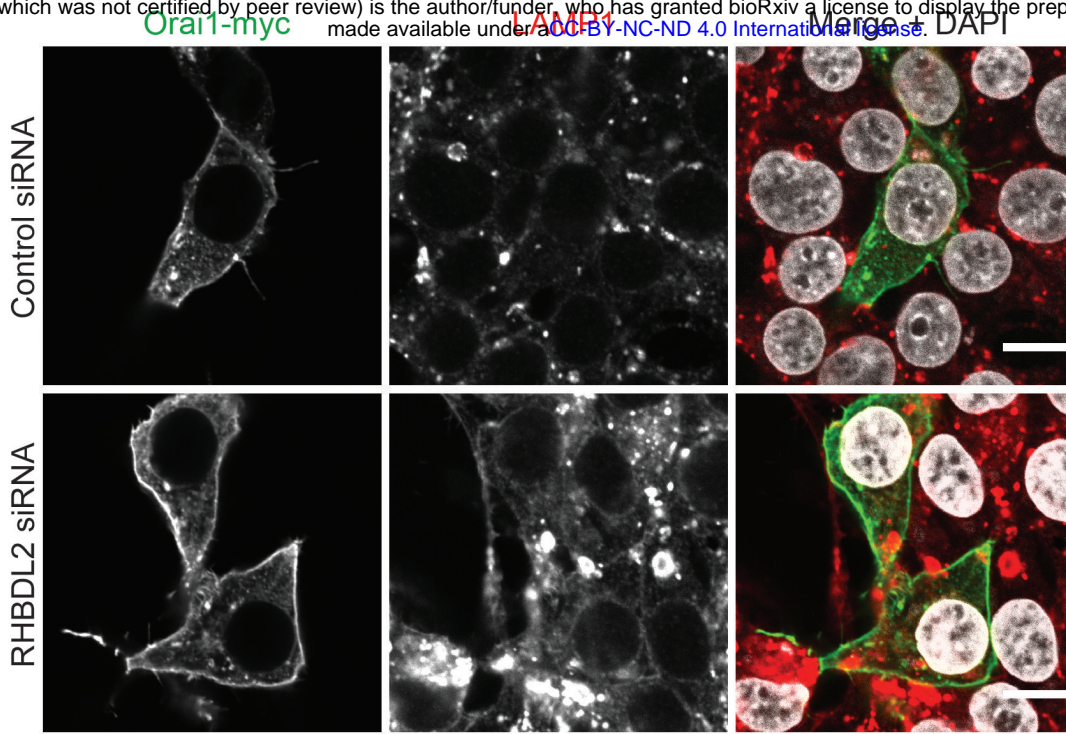

Figure 5

B

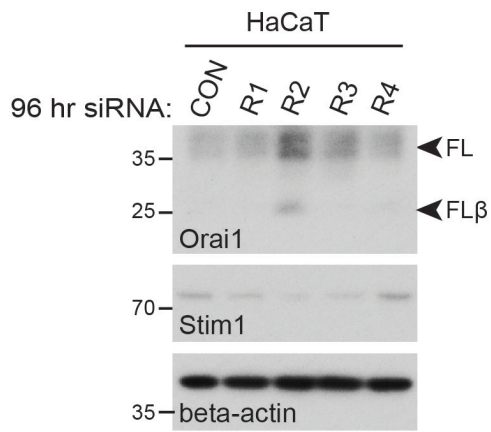

C

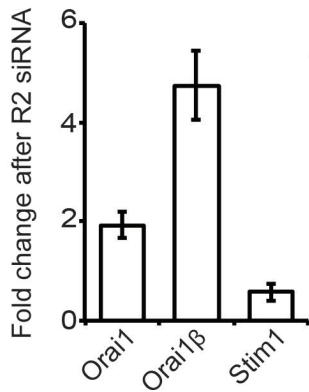

D

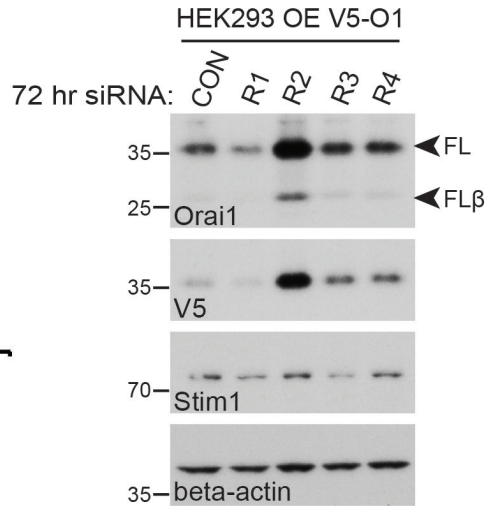

E

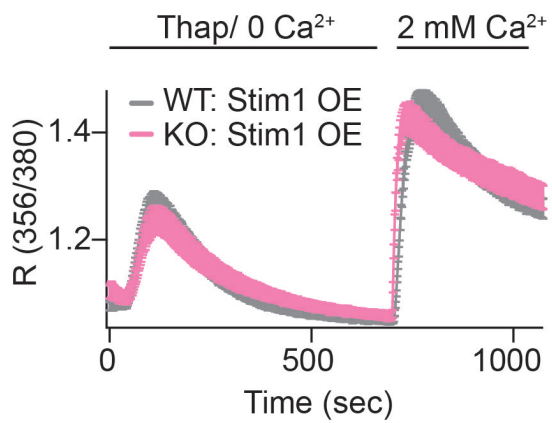

F

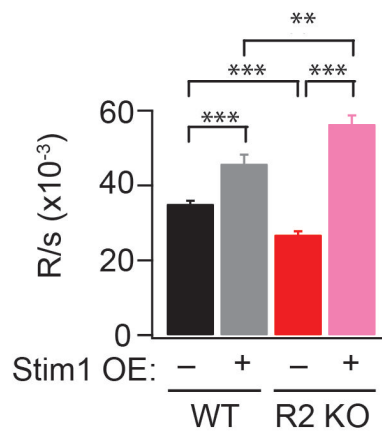

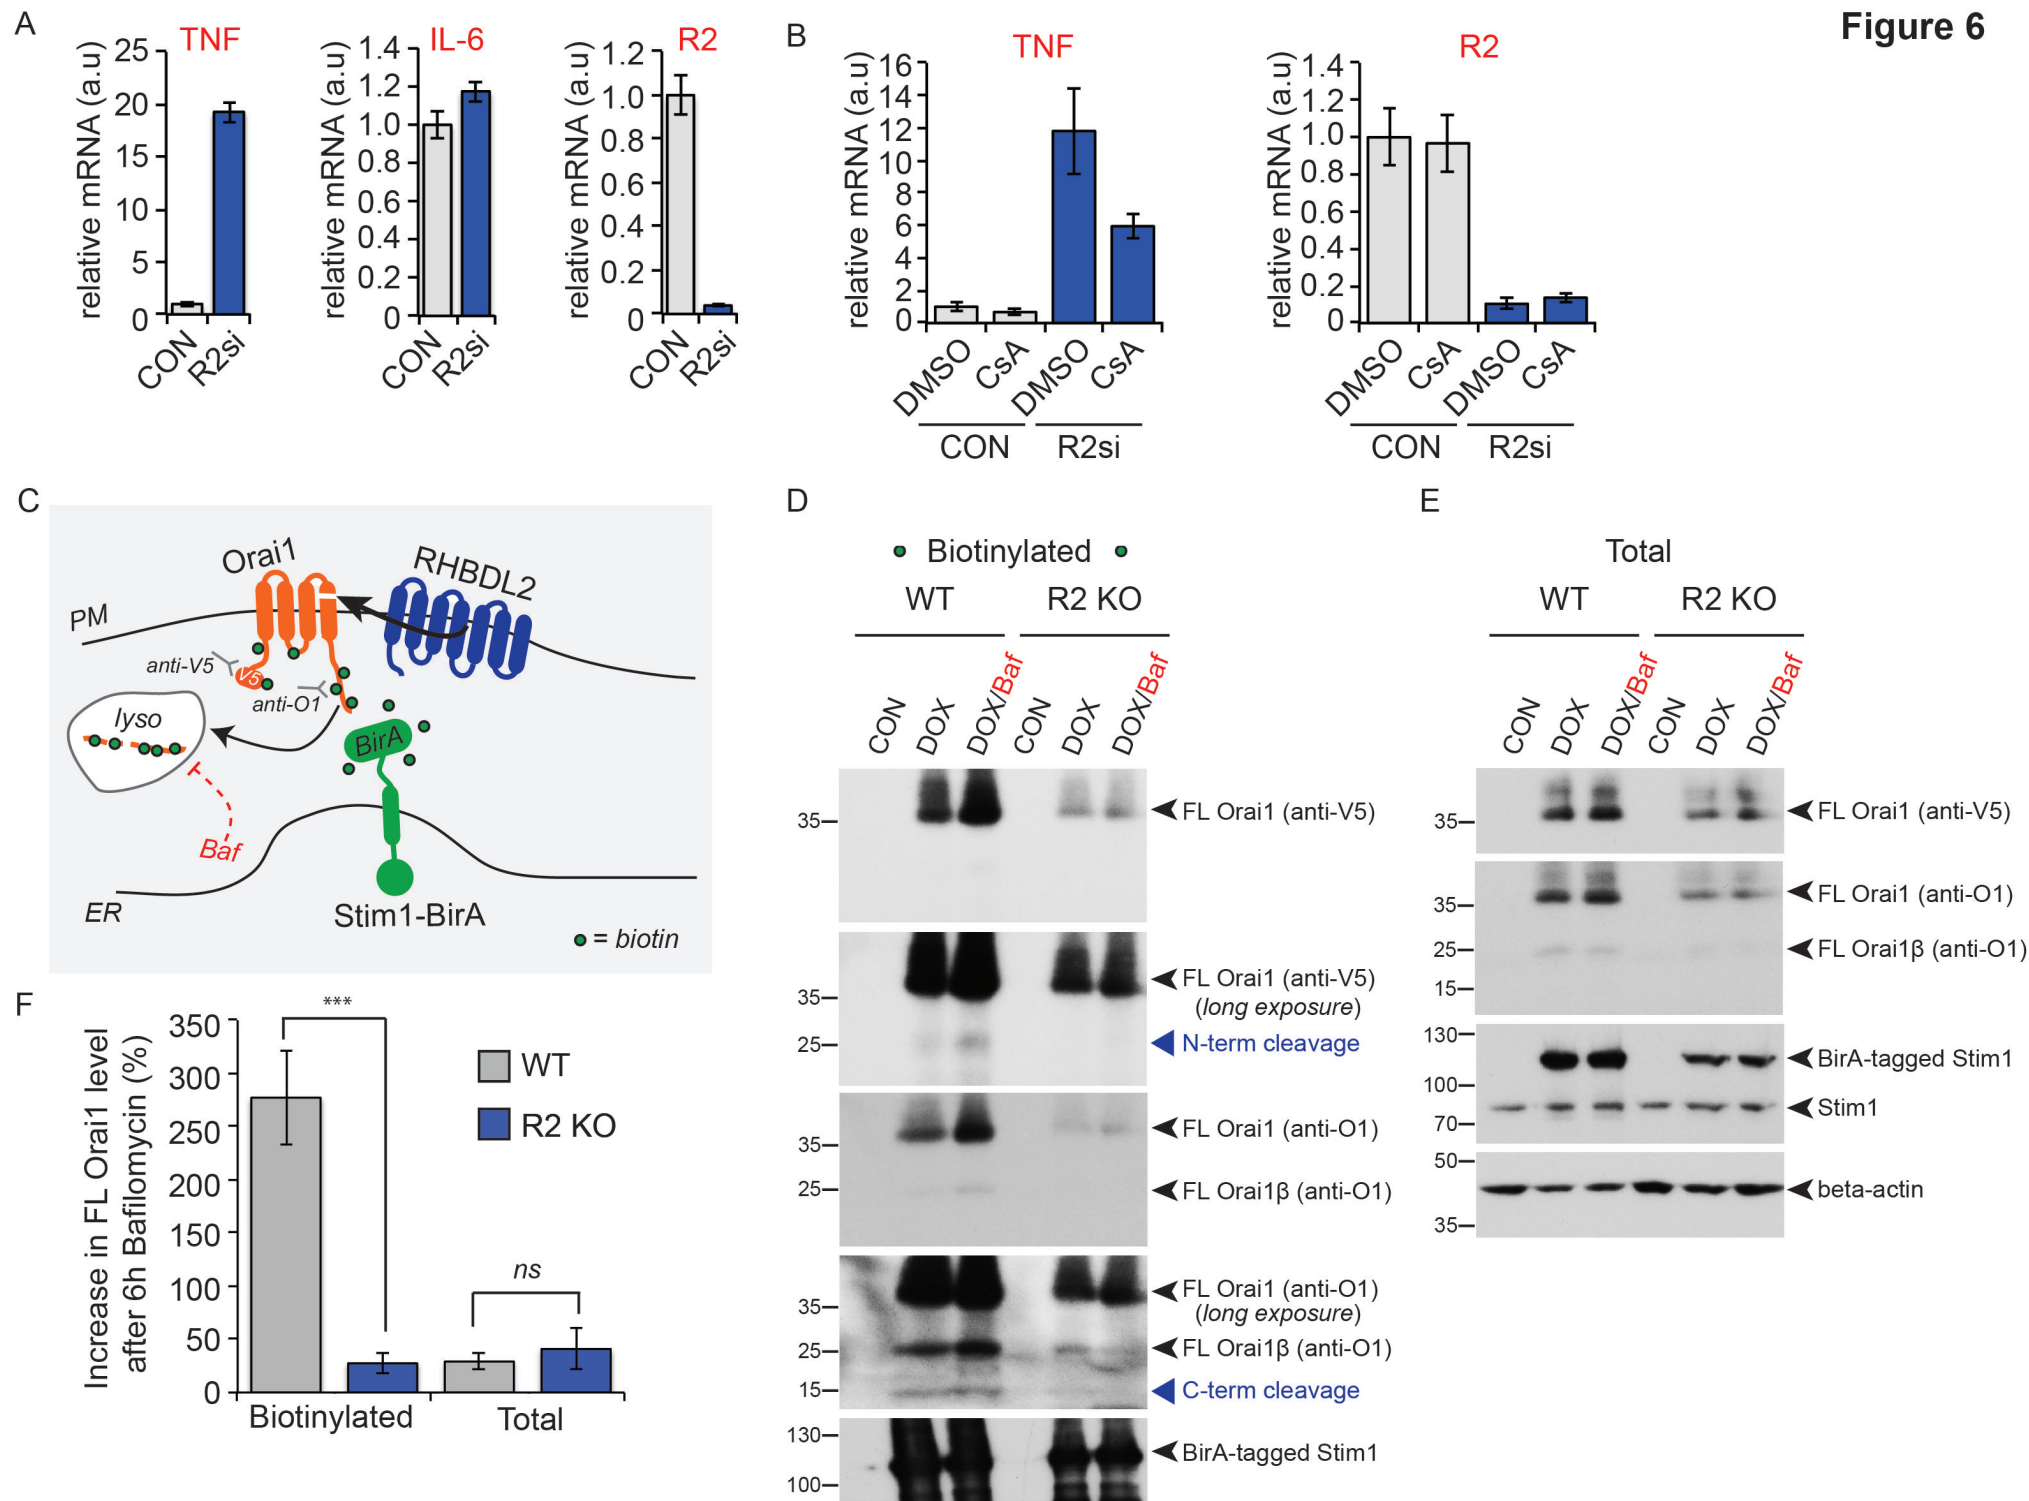



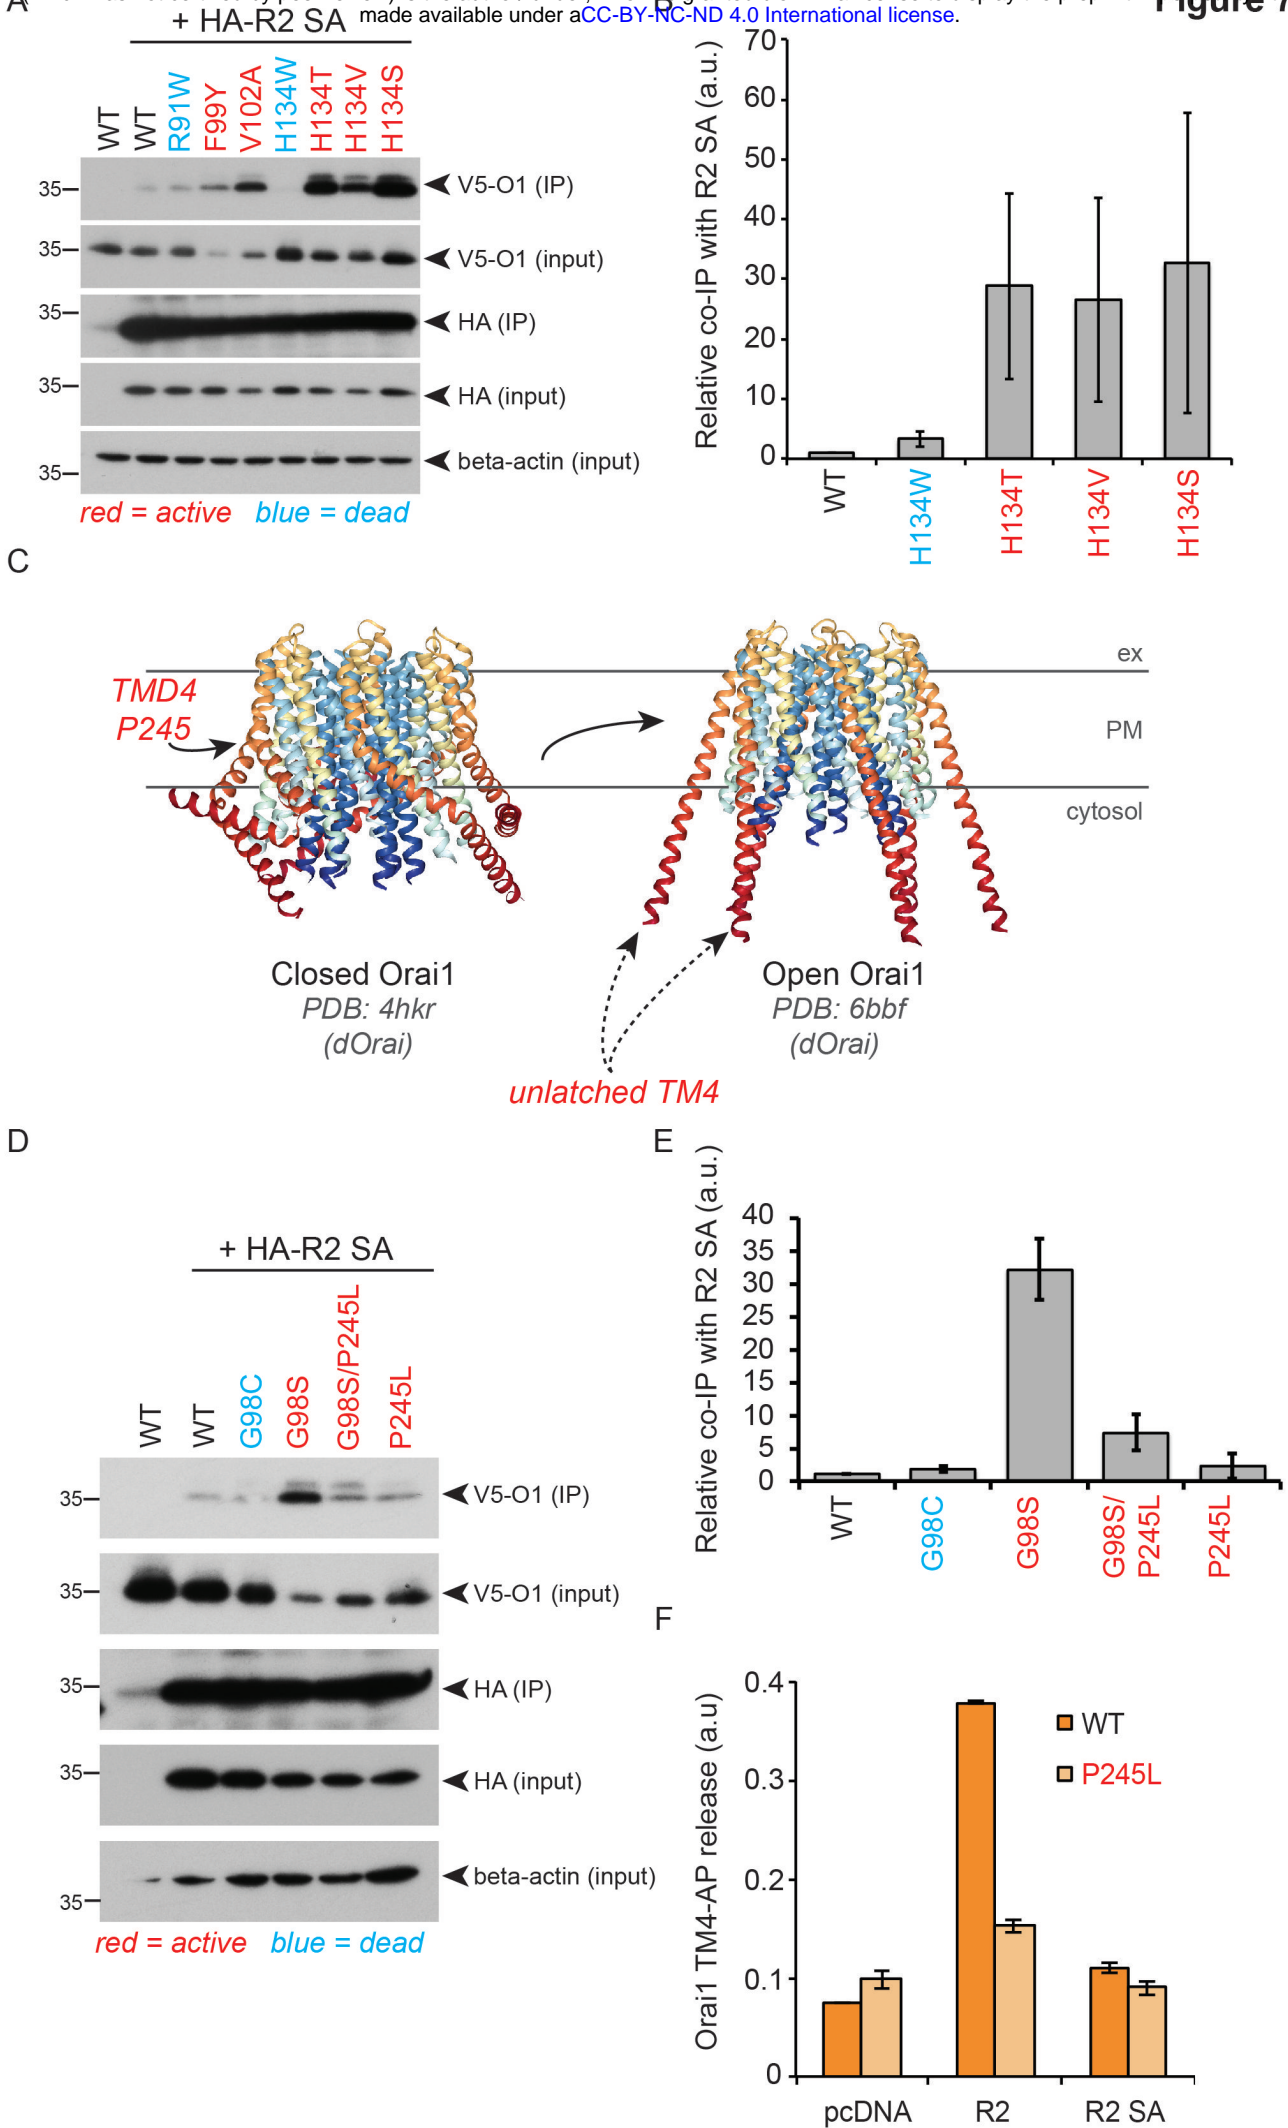

A

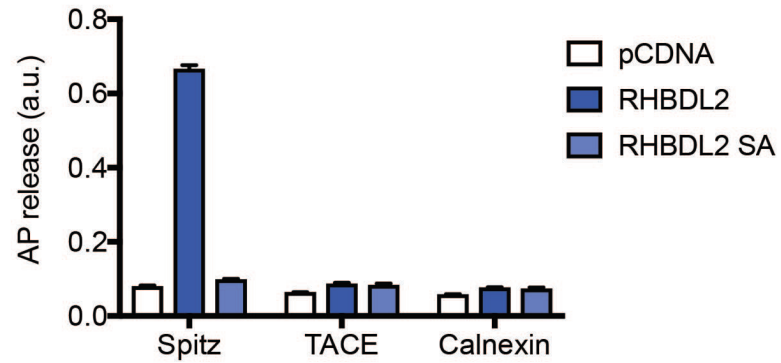

B

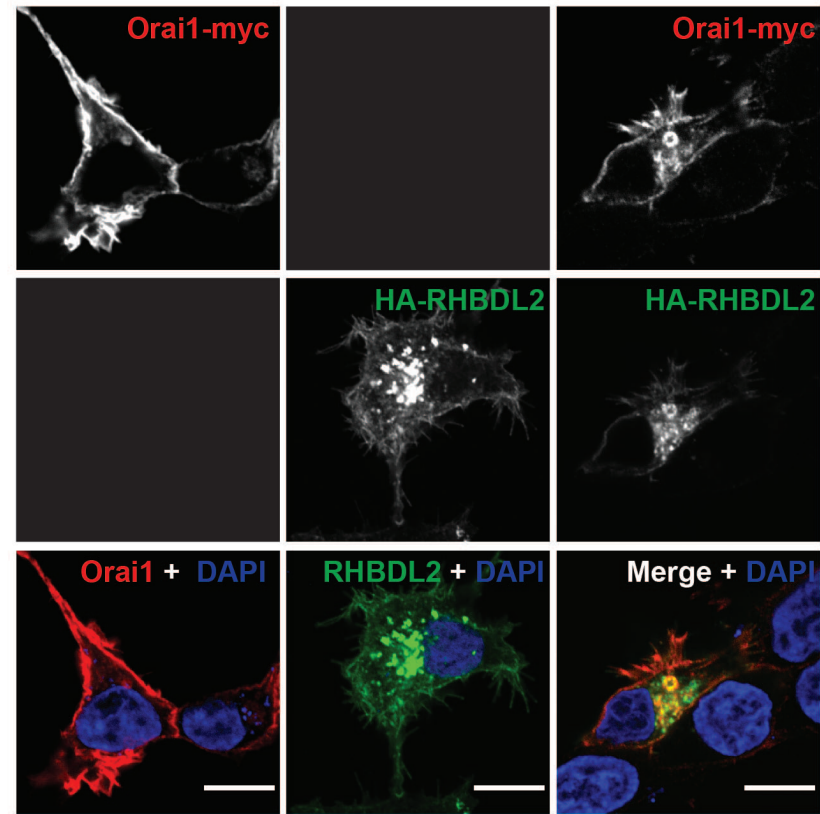

C

cleavage site

ss\_pred: **chhhHHHHHHHHHHHHHHHHHHHHHHHH**

Spitz: **EKASIASGAMCALVFMLFVCLAFY**

consensus: **EtASIAgGatlAv-l-vi-c---y**

.+|.+++-+++.=+.++++.+.-

consensus: **--AA-asT-ImVPvglvFvvFAvH**

Orai1: **EAAAIASAIMVPCGLVFIVFAvH**

ss\_pred: **hHHHHHHHHHHHHHHHHHHHHHHHHHHHH**

confidence: **35777776666555555544433**

D

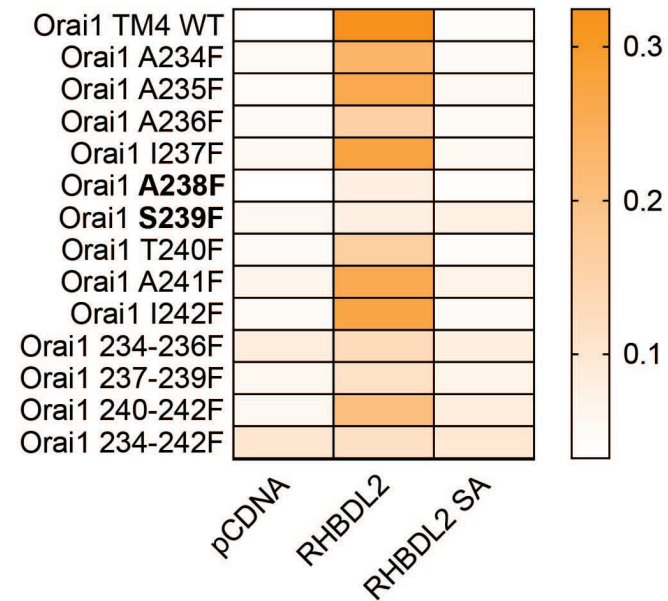

A

WT: **TTATTTCCATTTTCCCTCCTTTTCTCCCAAGGTGCTTTTGCAGCTCACA** <sup>His</sup>  
 R2 KO: **TTATTTCCATTTTCCCTCCTTTTCT**-----

WT: **TTGCAGGTGGATTGCTGGAATGTC** **CATTGGCTACACGGTGTTAGCTGC**  
 R2 KO: --**CCCAATGTTGAGCTGCAAAAGACA** **CATTGGCTACACGGTGTTAGCTGC**

B

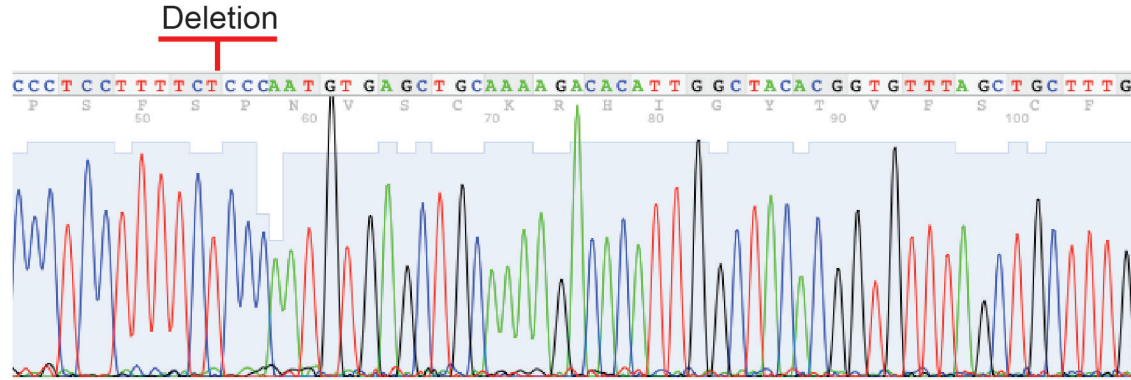

C

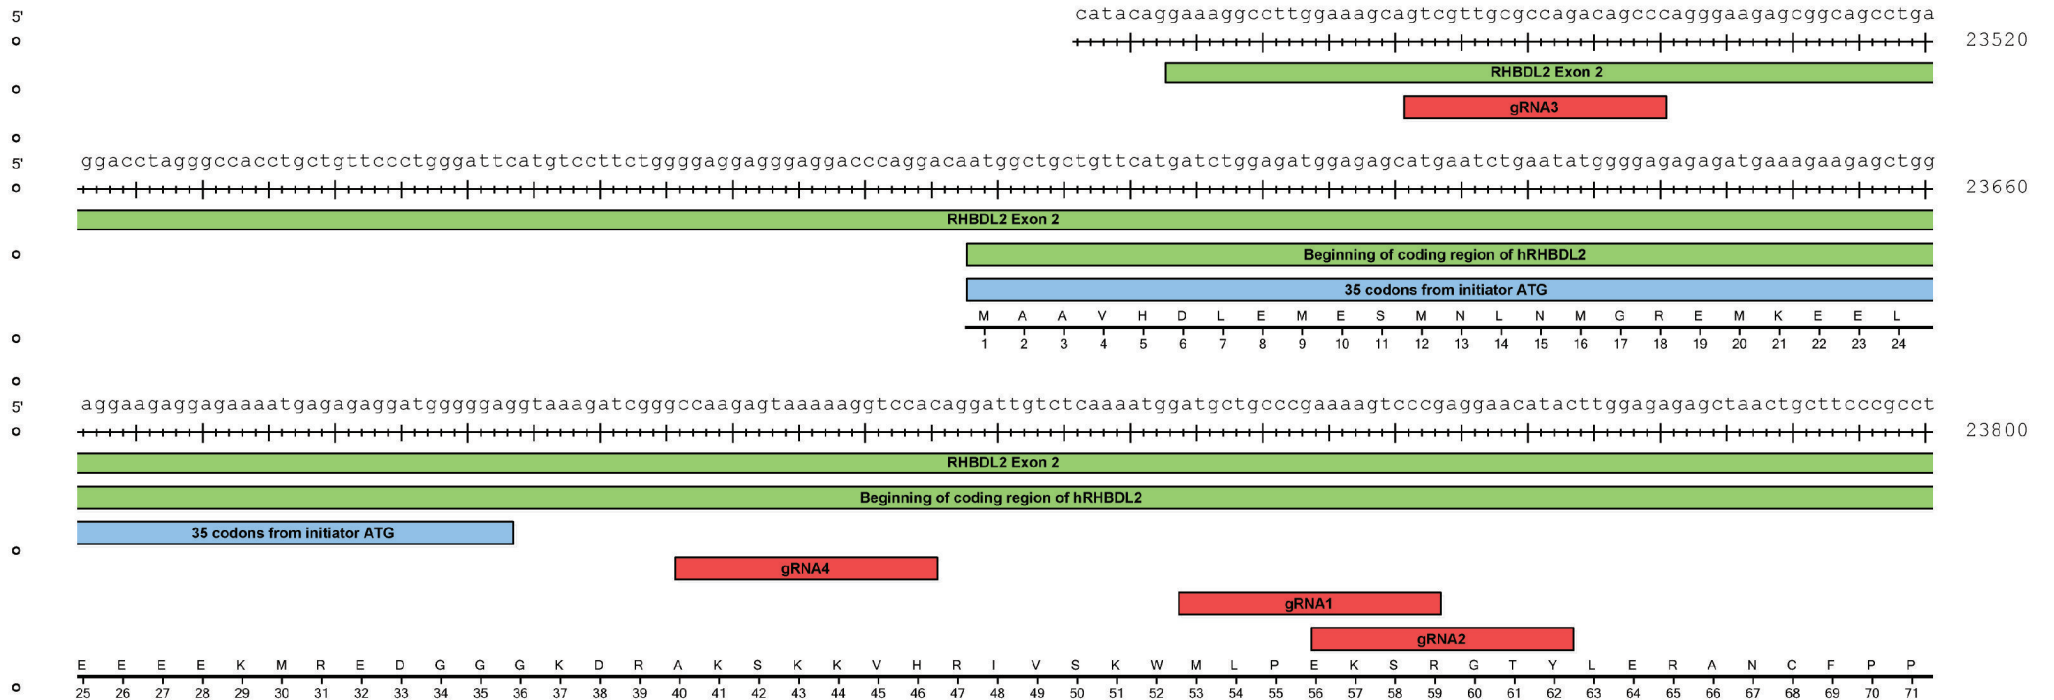

D

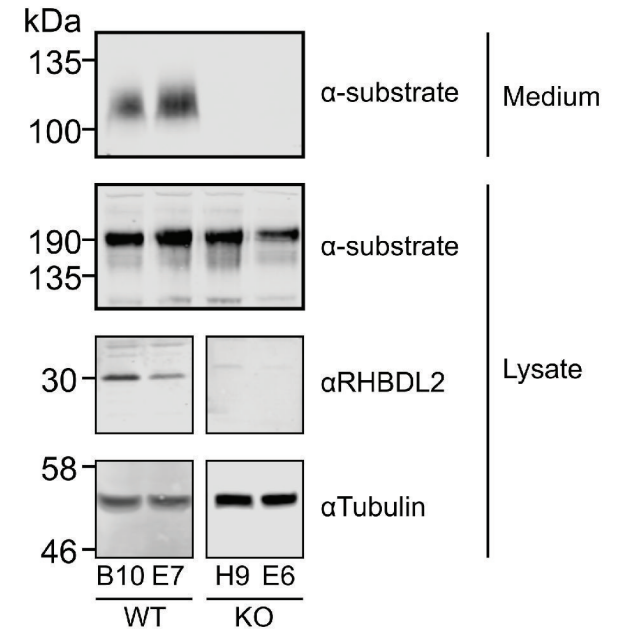

A

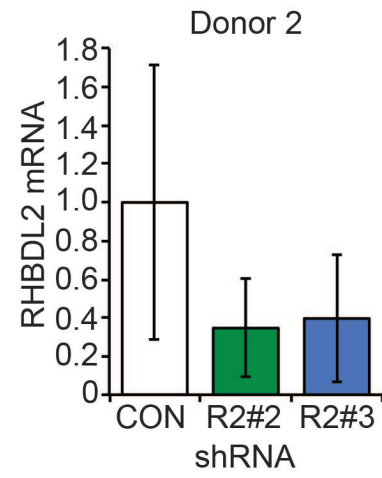

B

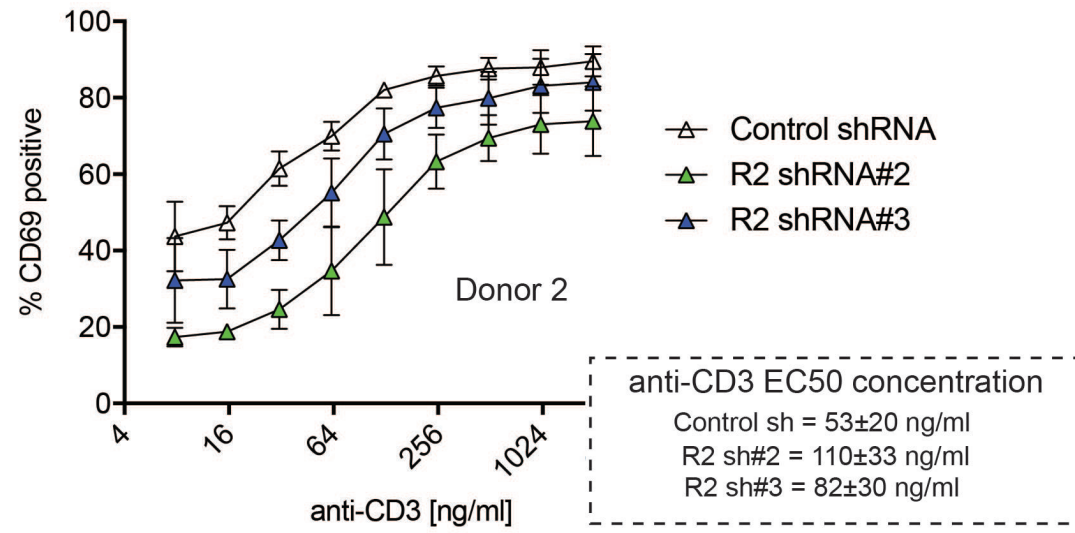



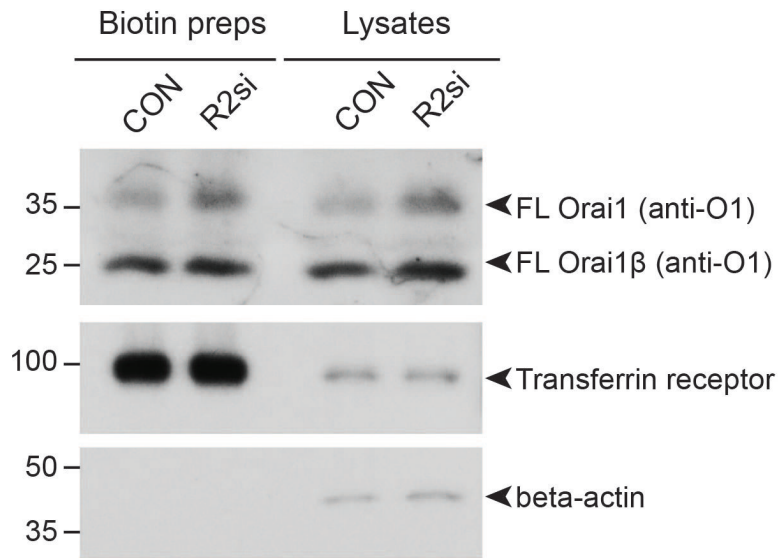

Figure S4

**Table S1**

| <b>Gene name</b> | <b>TMD region (+ 7AA out/3AA in)</b>          |
|------------------|-----------------------------------------------|
| 241RIK           | SFSPTTPTITAGLVLVLPVLTGGLSATIPLEY              |
| A2RSL7           | VSSVFLRGLIQGIVYGAIASALFFFLVVLVMKM             |
| ADAM17           | GKFLADNIVGSVLVFSLIFWIPFSILVHCVDKK             |
| ADAM1a           | DEEVNLKVMVLVPIFLVLLCCLMLIAYLWSE               |
| ADAM2            | YRSKSPRWPFLLIIPFYVVILVLIGMLVKVYSQ             |
| ADAM26           | LPLSHSKWIVYILVLDVCIVIIIYLFSEYKLS              |
| ADAM28           | ENSATVFHFSIVVGVLFPLAVIFVVAIVIQRQ              |
| ADAM29           | TNKKKHFFYLLLLQLIILACLLSCLLWLLFNIK             |
| ADAM6            | IKQNLEPVVYLRILFGRIYFLFVALLFGIATRV             |
| AMN              | ELNQSSSGAGLAGGVAALVLLALLGTVLLLLHRS            |
| AREG             | DKDLSKIAVVAVTIFVSAIILAAIGIGIVITVHL            |
| ASIC1            | KAYEIAGLLGDIGGQMGLFIGASILTVELEFDYAYEVIKHLRRCR |
| ASIC4            | AAYGLSALLGDLGGQMGLFIGASILTLEILDYIYEVSWDRCLKRV |
| ASIC5            | KAVSVPELLADVGGQLGLFCGASLITIEIIEYFFTNFYVWLIF   |
| ATRAID           | KCMRQGSFLLMFFGILGSTTLAISILLWGTQR              |
| ATRN             | QHSNFMDLVQFFVTFSCFLSLLLVAAVVWKIK              |
| BACE1            | PQTDESTLMTIAYVMAAICALFMLPLCLMVCQWR            |
| BACE2            | ALNEPILWIVSYALMSVCGAILLVLLLLLPLH              |
| BCAM             | VAPQTAQAGVAVMAVAVSVGLLLLVAAFYCMRR             |
| BTC              | FYLQQDRGQILVVCLIVMMVVFILVIGVCTCCH             |
| C11ORF24         | TPSLVNKMLLLVLLVGVTLFIAVLVMFALQAY              |
| C17ORF80         | CNTTIKSGVGGTMLFAGYFILCCNWSFKHLKL              |
| CADM3            | VPSSSSTYHAIIGGIVAFIVFLLLILLIFLGHY             |
| CD248            | QSQRDDRWLLVALLVPTCVFLVLLALGIVYCT              |
| CD276            | QPLTFPPEALWVTVGLSVCLVLLVALAFVCWRK             |
| CD4              | LSRGVNQTVFLACVLGGSFGFLGFLGLCCV                |
| CD40             | LKSRMRALLVIPVVMGILITIFGVFLYISGQET             |
| CD93             | DGQNLLLFYILGTVAISLLLVLALGILYHKR               |
| CDH1             | AAGLQVPAILGILGGILALLILLLLLLFLRRR              |
| CDH10            | LPAGLSTGALIAILLCIILLVIVVLFALKRQ               |
| CDH12            | LPVGLSTGALIAILLCMVILLAIIVVLYVALRRQ            |
| CDH2             | GAGLGTGAIILLCIILLILVLMFVVMKRR                 |
| CDH24            | SPTGLSTGALLAIVTCMGTLALVVLVVALRRQ              |
| CDH26            | EPSDTWLLWWALSPVGAALMVLSAALLCLLRCS             |
| CDH3             | PRPWKGGFILPILGAVLALLTLLALLLLVLRKK             |
| CDH4             | AAAGLGTGAIVAILICIVILLIMVLLFVVMKRR             |
| CDH6             | HPTGLSTGALVAILLCIVILLVTVVLFAALRRQ             |
| CEACAM19         | PVHAGITVAIIIGSLAIGSLLVCGIAYVLVTRSR            |
| CLDN16           | YKFGWSCWLGMAGSLGCFLAGALLTCCLYLFKDV            |
| CLEC14A          | FDTSSVVFILVSIIVLVVLTITVGLGFLKLC               |
| CNTNAP2          | RNGVNRNSAIIGGVIAVVIFTILCTLVFLIRYM             |
| CRB1             | LDLADDRLLGIFTAVGSGTLALFFILLLAGVAS             |

|          |                                     |
|----------|-------------------------------------|
| CSMD1    | HYQGTSSGSVAAAAILVPPFALILSGFAFYLYKHR |
| CSPG5    | SIITDFQVMCVAVGSAALVLLLLFMMTVFFAKK   |
| DLK1     | LLTEGQAICFTILGVLTSLVVLTVAIVFLNKC    |
| DLL1     | SQGGPFPWVAVCAGVVLVLLLLGCAAVVVCVR    |
| DLL4     | GLPPSFPWVAVSLGVGLVLLVLLVMVVAVRQ     |
| DNER     | TNMPRHSLYIIIGALCVAFILMLIILIVGICRI   |
| DSC1     | PNIILGKMAILAMVLGSALLLCILFTCFVTTT    |
| DSCAM    | LTTNEGLKILVTISCILVGVLLLFVLLVRRRR    |
| EGF      | GYGQKHDIMVVAVCMVALVLLLVLMWGTYYYRT   |
| EGFR     | SGPKIPSIATGIVGGLLFIVVALGIGLFMRRR    |
| EPHA1    | RSLTGGEIVAVIFGLLLGIALLIGIYVFRSRRG   |
| EPHA7    | SSEQNPVIIIAVVAVAGTIILVFMVFGFIIGRR   |
| EPHRINB2 | LGSEVALFAGIASGCIIFVIIIITLVVLLKYR    |
| EPIGEN   | AVDSYEKYIAIGIVGLLISAF LAVFYCYIRKR   |
| ERBB2    | QRASPVTFIIATVVGVLFLIIVVIGILIKRR     |
| ERBB3    | VLMSKPHLVIAVTVGLTVIFLILGGSFLYWRGR   |
| ERBB4    | QHARTPLIAAGVIGGLFILVIMALTFAVYVRRK   |
| ESYT1    | LTSFGRLLVLPVYLAGAAGLSVGFVLFGLAL     |
| EVA1A    | YISENPERAALYFVSGVCIGLFLTLAALVMRISC  |
| EVA1B    | IRANPESFGLYFVLGVCFGLLLTLCLLVISISCA  |
| FAT2     | GDWGGQEFVVIIVALPLLIATVGLLLYCRRCK    |
| FGRL1    | SSSSTSLPWPVVIGIPAGAVFILGTVLLWLCQTK  |
| FRAS1    | AASLSQTGASIGSALAAIMLLLLFLVACFVTRK   |
| GLYA33   | PRPPSMNIALYAGIAGSVFVALIIIGVIVYCCC   |
| H2Aa     | PMSLETETVVCALGLSVGLVGVVGTIFIIQGL    |
| H2D1     | PSSTKTNTVIIAVPVVLGAVVILGAVMAFVMKR   |
| H2DMa    | PSDLLENALCGVAFGLGVLTGIIIGIVFFLCSQR  |
| H2DMb1   | PGLSPIQTVKVSVSAATLGLGFIIFCVGFWR     |
| H2EAPS   | LLPETTENVVCALGLFVGLVGVVGIILIMKGIK   |
| H2M10.4  | GPPQTIPIIAILIGLVLVALVVGTVVIFLVWRK   |
| H2M11    | PEPTISFMHIVVVVLGALLMGAMMTLLIWKRR    |
| H2Ob     | SEYSWKKILSGAAVFLGLIVFLVGVVHILKAQK   |
| H2T3     | TSMPNRTTVRALLGAMIILGFMMSGVMMWMRKN   |
| HAVR2    | DSGETIRTAIHIGVGVSAGLTLALIIGVLILKWY  |
| HURPUD1  | TFSVFLSILYFYSSLSRFLMVMGATVVMYLHHV   |
| HURPUD2  | RAAVLLSIVYFYSSFSRFIMVMGAMLLVYLHQA   |
| ICAM2    | PMQDNQMVIIIIVVSILLFLFVTSVLLCFIFGQ   |
| IL11RA2  | RDPLEQVAVLASLGFISCLGLAVGALALGLWLRL  |
| IL13A2R  | YTGPDSKIIFIVPVCLFFIFLLLLLCLIVEKEE   |
| IL20R    | SAWKAKVIFWYVFLTSVIVFLFSAIGYLVYRYI   |
| IL22R1   | KTLPDRTWAYSFSGAVLFSMGFLVGLLCCYLGYKY |
| IL7R     | NQGGWDPVLPVSVTILSLFSVFLLVILAHVLWKKR |
| IMPG2    | FVSEPFVIGITIASVVSFLLVASAVVFFLVKML   |
| INSULINR | VPSNIAKIIIGPLIFVFLFSVIGSIYLFRLKR    |
| ITGA1    | GLPGRVPLVWILLSAFAGLLLLMLLILALWKIG   |

|             |                                         |
|-------------|-----------------------------------------|
| ITGA2b      | RALEERAIPVWWWLVGVLGGLLLLTLVLAMWK        |
| ITGA5       | EGSNGVPLWIIILAILFGLLLLGLLIYVLYKLG       |
| ITGA6       | AQYSGVAWWIILLAVLAGILMLALLVFLWKC         |
| ITGAL       | LIHEKEMLVVYVLSGIGLVLLFLIFLALYKVG        |
| ITGB1       | DCPTGPDIIPIVAGVVAGIVLIGLALLLIWKLL       |
| ITGB3       | ECPKGPDILVVLLSVMGAILLIGLATLLIWKLL       |
| ITGB6       | DCPKPPNIPMIMLGVSLLAILLIGVVLLCIWKLL      |
| JAG1        | LKNRTDFLVPLLSSVLTVAWVCCLVTAFYWCVR       |
| JAM1        | VELNVGGIVA AVLVTLLGLLIFGVWFAYSRG        |
| JAM2        | GKRMQVDVLNISGIIATVVVAFVISVCGLGTC        |
| KCNA2       | PTTIGGKIVGSLCAIAGVLTIALPVPVIVSNFNFYHRE  |
| KCND2       | PKTIAGKIFGSICSLSGVLVIALPVPVIVSNFSRIYHQN |
| KCNJ12      | LRCVTEECPVAVFMVVAQSIVGCIIDSFMIGAI       |
| KCNJ2       | CVTDECPIAVFMVVFQSIVGCIIDAFIIGAVMA       |
| KCNJ4       | FRCVTEECPLAVIAVVVQSIVGCVIDSFMIGTI       |
| KIRREL2     | LLPTVRIVAGAASAATSLLMVITGVVLCWRHGS       |
| KITL        | PEDSGLQWTAMALPALISLVIGFAFGALYWKKKQ      |
| L1-CAM      | TGSFASEGWFIAFVSAIILLLLILLILCFIKRS       |
| LDLR        | EEQPHGMRFLSIFFPIALVALLVLGAVLLWRNW       |
| LRP1B       | HISTRSAIIVPLVLLVTLVTTLVIGLVVCKRK        |
| LRRTM1      | NAVQIHKVVTGTMALIFSFLIVVLVLYVSWKCF       |
| LRRTM4      | EHVSFHKIIAGSVALFLSVAMILLVIYVSWKRY       |
| LRTM1       | PTNLRHAVATVVITGVVCGIVCLMMLAAAIYGC       |
| LRTM2       | RRAIGTVIIAGVVCGIVCIMMVVAAAYGCIYAS       |
| LYSM        | PYYGADWGWGWTAVVIMLIVGIITPVFYLLYY        |
| MEGF11      | LGAERHSVGAVTGIVLLLFLVVLLGLFAWRRR        |
| MEGF9       | VSWTQFNIIILTVIIIVVLLMGFVGAVYMYRE        |
| MEP1A       | GERCQAMHVHGSLLGLLIGCIAGLIFLTFVTF        |
| MUC4        | LSVKLGAFYGILFGTLGALLLLGILAFMIFHFC       |
| NCAM        | IPANGSPTAGLSTGAIVGILIVIFVLLLVMDI        |
| NEUREGULIN4 | SIPSESNLSAAFVVLAVLLTLTIAALCFLCRKG       |
| NEUROFASCIN | QADIATQGWFIGLMCAIALLVILLIVCFIKRS        |
| NOTCH       | PPLPSQLHLMYVAAAFAVLLFFVGCGLLSRKR        |
| NrCAM       | QVDIATQGWFIGLMCAVALLLILLIVCFIRRN        |
| NRXN1       | IRESSSTTGMVVGIVAAAALCILILLYAMYKYR       |
| ORAI1 TM4   | ITPGEAAAIASTAIMVPCGLVFIVFAVHFYRSL       |
| ORAI2 TM4   | PGSHSHTGWQAALVSTIIMVPVGLIFVVFTIHFY      |
| ORAI3 TM4   | AHGPGWQAAMASTAIMVPVGLVFMAFALHFYRSL      |
| PCDH1       | ERSKQRGNILFGVVAGVVAALLIALAVLVRYC        |
| PCDHB12     | DYDVLTLYLVALASVSSLFLLSVLLFVGVRLCR       |
| PDGFRb      | SLPFKVVVISAILLVVLTVISLIILIMLWQKK        |
| PEAR1       | SPVTHNSLGAVIGIAVLGTLVVALIALFIGYRQ       |
| PLXNA2      | SDSLLTLPAAISIAAGGSLLLIIIVLIAAYKRK       |
| PLXNA4      | PDSPLSLPAIVSIAVAGLLIIFIVAVLIAAYKRK      |
| PLXNB3      | MSTFPVEAQLGLGMGAAVLIAAVLLLTLMYRHK       |

|                |                                    |
|----------------|------------------------------------|
| PVRL2          | AGAGATGGIIGGIIAIIATAVAGTGILICRQQ   |
| PVRL2b         | SRDVGPLVWGAVGGTLLVLLLAGGFLALILLRG  |
| PVRL3          | LKDDTIGTIIASVVGALFLVLVSILAGVFCYR   |
| PVRL3b         | TQTSSIAVAGAVIGAVLALFIITVFVTVLLTPR  |
| SCARF          | GRHGKNALIVGILVPLLLLLLMGIVCCAYCCSGT |
| SDK1           | EAPFYEEWWFLLVMALSSLLLILLVVFVLVLHG  |
| SELE           | PVSPTRPLVVALSAAGTSLTSSSLLYLLMRYF   |
| SELL           | IKEGDYNPLFIPVAVMVTAFSGLAFLIWLARRL  |
| SEMA4C         | APLENLGLVWLAVVALGAVCLVLLLLVLSLRRR  |
| SEZ6           | SALDAAHLAAIFLPLVAMVLLVGGVYLYFSRFQ  |
| SHISA5         | MFGGATVAIGVTIFVVFIIATIIICFTCCSCCLY |
| SIGLEC-LIKE1   | TLSEMMMGTFVVGSGVTALLFLSVCILLAVRSY  |
| SIRPA          | NATHNWNVFIGVGVACALLVLLMAALYLLRIK   |
| SLAMF6         | LTNPPWNAVWFMTTISIISAVILFVCWSIHVW   |
| SLC6A11        | NNVYTPAWGYGIGWLMALSSMLCIPLWIFIKL   |
| SORL           | QAARSTDVAAVVPIFLILLSLGVGFAILYTK    |
| SPASTIN        | PSSFSSPLVVGFAALLRLLACHLGLLFAWLCQRF |
| SPINK8         | KVIFSVAVLVLASSVWTS LAVDFILPMN      |
| SPINT2         | FLTPGLKAVILVGLFLMVLILLGTSMVCLIRVV  |
| <b>SPITZ</b>   | PRPMLEKASIASGAMCALVFMLFVCLAFYLRFE  |
| STAB           | LGSEPPPVALSLGVVVTSGTLLGLVAGALYLRA  |
| STAB2          | TAAHSGLGTGIFCAVVLVTGAIALAAYSYFRLN  |
| SYT14          | IRKVSPEAVGFLSAVGVFIVLMLLLFLYINKKF  |
| SUSD3          | FGFKVAIVASIVSCAIIILMSMAFLTCCLLKCVK |
| SYNDECAN3      | LERKEVLVAVIVGGVVGALFAAFLVTLIIYRMK  |
| SYT1           | LHKIPLPPWALIAIAIVAVLLVVTCCFCVCKKC  |
| SYT2           | INKIPLPPWALIAMAVVAGLLLLTCCFCICKKC  |
| SYT6           | ADSGTSVSLAVVVIVCGVALVAVFLFLFWKLC   |
| TGFA           | AASQKKQAITALVVSIVALAVLIITCVLIHCC   |
| TLR1           | SPLSCDTVLLTVTIGATMLVLAVTGAFLCLYFDL |
| TLR12          | RCRLELRLATSLLLAAPSPVLLLVFLEPISRHQ  |
| TLR4           | KTIISVSVVSVIVVSTVAFLIYHFYFHLIAGC   |
| TMEFF          | SRQKLTHVLIAAIGAVQIAIIVAIMCITRKC    |
| TMEM119        | MDFFRQYVMLIAVVGSLTFLIMFIVCAALITRQ  |
| TMEM154        | DTSNQVEFILMVAIPLAALLILLFMVLIATYFK  |
| TNFRSF14       | TTCSSQVYVYVVSILLPLVIVGAGIAGFLICTRR |
| UNC5B          | PLETSGDVALYAGLVAVFVVAVLMAVGVIVY    |
| UNC5C          | SAPDSDVALYVGIVIAVTVCLAITVVVALFVY   |
| VSIR           | QSDSITAAALATGACIVGILCLPLILLVYKQR   |
| ZPLD1          | QLNAVTSLSLISGMVILGVLCSLLCSLALLHRK  |
| Calnexin       | AAEERPWLWVVYILTVALPVFLVILFCCSGKKQ  |
| Thrombomodulin | ARPVHSGVLIGISIASLSLVVALLALLCHLRKK  |
| HB-EGF         | YTYDHTTVLAVVAVLSSVCLLVIVGLLMFRYH   |
